# Supplementary material
Source: ML conference proceedings conference paper supplement (https://proceedings.neurips.cc/paper_files/paper/2023/hash/f7e8bc4c853e3e58bc487e213c79c587-Abstract.html)

---

# Strategic stability under regularized learning in games

---

## Abstract

1 In this paper, we examine the long-run behavior of regularized, no-regret learning in  
2 finite games. A well-known result in the field states that the empirical frequencies  
3 of no-regret play converge to the game’s set of coarse correlated equilibria; however,  
4 our understanding of how the players’ *actual* strategies evolve over time is much  
5 more limited – and, in many cases, non-existent. This issue is exacerbated by  
6 a series of recent results showing that *only* strict Nash equilibria are stable and  
7 attracting under regularized learning, thus making the relation between learning  
8 and pointwise solution concepts particularly elusive. In lieu of this, we take a more  
9 general approach and instead seek to characterize the *setwise* rationality properties  
10 of the players’ day-to-day play. To that end, we focus on one of the most stringent  
11 criteria of setwise strategic stability, namely that any unilateral deviation from the  
12 set in question incurs a cost to the deviator – a property known as *closedness under*  
13 *better replies* (club). In so doing, we obtain a remarkable equivalence between  
14 strategic and dynamic stability: *a product of pure strategies is closed under better*  
15 *replies if and only if its span is stable and attracting under regularized learning*.  
16 In addition, we estimate the rate of convergence to such sets, and we show that  
17 methods based on entropic regularization (like the exponential weights algorithm)  
18 converge at a geometric rate, while projection-based methods converge within a  
19 *finite* number of iterations, even with bandit, payoff-based feedback.

## 20 1 Introduction

21 **Background.** The question of whether players can learn to emulate rational behavior through  
22 repeated interactions has been one of the mainstays of non-cooperative game theory – and it has  
23 recently gained increased momentum owing to a surge of breakthrough applications to machine  
24 learning and data science (from online advertising to auctions and multi-agent reinforcement learning).  
25 Informally, this question can be stated as follows:

26 *If each player follows an iterative procedure aiming to increase their individual payoff,*  
27 *does the players’ long-run behavior converge to a rationally admissible state?*

28 A natural setting for studying this question is to assume that each player is following a no-regret  
29 algorithm, i.e., a policy which is asymptotically as good against a given sequence of payoff functions  
30 as the best fixed strategy in hindsight. In this framework, the link between learning and rationality  
31 is provided by a folk result which states that, under no-regret learning, the empirical frequency of  
32 play converges to the game’s set of *coarse correlated equilibria* (CCE) – also known as the game’s  
33 *Hannan set* [22]. This result has been of seminal importance to the field because no-regret play can  
34 be achieved via a wide class of “regularized learning” policies, as exemplified by the “*follow-the-*  
35 *regularized-leader*” (FTRL) family of algorithms [41, 42] and its variants – optimistic mirror descent  
36 [13, 36, 37, 43], HEDGE / EXP3 [4, 5, 9, 10], implicitly normalized forecasters [1, 3], etc.

37 All these policies have (at least) one thing in common: they seek to provide the tightest possible  
38 guarantees for each player’s individual regret, thus accelerating convergence to the game’s Hannan set.  
39 As such, in games where the marginalization of CCE coincides with the game’s Nash equilibria (like  
40 two-player zero-sum games), we obtain a positive equilibrium convergence guarantee: the long-run  
41 average frequency of play evolves “as if” the players were rational to begin with – i.e., as if they  
42 had full knowledge of the game, common knowledge of rationality, the ability to communicate this  
43 knowledge, etc.

On the other hand, in many concrete applications – and, in particular, in the context of regularized learning – players learn *independently* from one another, with no common correlating device. By comparison, the Hannan set consists of *correlated* strategies which, when marginalized, may fail even the weakest axioms of rational behavior and rationalizability (such as the elimination of strictly dominated strategies). In particular, a well-known example of Viossat & Zapechelnyuk [45] (which we discuss in detail in Section 4) shows that it is possible to have negative regret for all time, but still employ only strictly dominated strategies throughout the entire horizon of play.

The reason for this disconnect is that no-regret play has significant predictive power for the empirical frequency of play – i.e., the empirical distribution of pure strategy *profiles* – but much less so for the players’ day-to-day sequence of play – that is, the evolution of the players’ *actual* mixed strategies over time. In particular, even when the marginalization of the Hannan set is Nash, the actual trajectory of play may – and, in fact, often *does* – diverge away from the game’s set of equilibria [14, 20, 29–31] or exhibits chaotic, unpredictable oscillations [11, 33].

Motivated by the above, our paper seeks to understand the rationality properties of the players’ *actual* sequence of play under regularized learning, as encoded by the following question:

*Which sets of mixed strategies are stable and attracting under regularized learning?  
Are these sets robust to strategic deviations? And, if so, is the converse also true?*

**Our contributions in the context of related work.** This question has attracted significant interest in the literature, especially in its pointwise version, namely: Which mixed strategy profiles are stable and attracting under regularized learning? Are the dynamics’ stable states robust to unilateral deviations? And, if so, are these the only stable states of regularized learning?

In the related setting of population games, the answer to this question is sometimes referred to as the “folk theorem of evolutionary game theory” [12, 23, 40, 47]. Somewhat informally, this theorem states that, under the replicator dynamics (the continuous-time analogue of the exponential / multiplicative weights algorithm, itself an archetypal regularized learning method), the following is true for *all* games: only Nash equilibria are (Lyapunov) stable, and a state is stable and attracting under the replicator dynamics if and only if it is a strict Nash equilibrium of the underlying game [23, 47].

In the context of regularized learning, [17, 28] recently showed that a similar equivalence holds for the dynamics of FTRL in *continuous* time: a state is stable and attracting under the FTRL dynamics if and only if it is a strict Nash equilibrium. Subsequently, [19] extended this equivalence to an entire class of regularized learning schemes, with different types of feedback and/or possible update structures – from optimistic methods to algorithms run with bandit, payoff-based information. In all these cases, the same principle emerges: a state is asymptotically stable and attracting under regularized learning if and only if it is a strict Nash equilibrium.

This is an important pointwise prediction but it does not cover cases where regularized learning algorithms converge to a *set* – not a point. In this case, the very definition of strategic stability is an intricate affair, and there are several definitions that come into play [6, 15, 18, 38]. The first such notion that we consider is that of “resilience to strategic deviations”, namely that every unilateral deviation from said set is deterred by some other element thereof. Our first contribution in this direction is a universal guarantee to the effect that, with probability 1, in any game, and from any initial condition, *the long-run limit of any regularized learning algorithm is a resilient set*.

This result is significant in its universality, but the notion of resilience is not sufficiently strong to disallow irrational behavior – and, in fact, it is subject to similar shortcomings as Hannan consistency. On that account, we turn to a much more stringent criterion of *setwise strategic stability*, that of *minimal closedness under better replies* (m-club). This notion, originally due to Ritzberger & Weibull [38], states that any deviation from a product of pure strategies is costly, and it is one of the strictest setwise refinements in game theory; in particular, it refines the notion of closedness under rational behavior (curb) [6], and it satisfies all the seminal *strategic stability* requirements of Kohlberg & Mertens [25], including robustness to strategic payoff perturbations.

In this general context, we show that regularized learning enjoys a striking relation with club sets: *A product of pure strategies is closed under better replies if and only if its span is stable and attracting under regularized learning*. More to the point, we also estimate the rate of convergence to club sets, and we show that convergence occurs at a geometric rate for entropically regularized methods – like HEDGE and EXP3 – and in a *finite number* of iterations under projection-based methods.

In light of the above, our results can be seen both as a far-reaching setwise generalization of the folk theorem of evolutionary game theory, as well as a bona fide algorithmic analogue of a precursor result for the replicator dynamics [39]. Importantly, our analysis covers several different update structures – “vanilla” regularized methods, but also their optimistic variants – as well as a wide range of information models – from full payoff information to bandit, payoff-based feedback.

## 2 Preliminaries

We start by recalling some basics from game theory, roughly following the classical treatise of Fudenberg & Tirole [18]. First, a *finite game in normal form* consists of (i) a finite set of *players*  $i \in \mathcal{N} \equiv \{1, \dots, N\}$ ; (ii) a finite set of *actions* – or *pure strategies* –  $\mathcal{A}_i$  per player  $i \in \mathcal{N}$ ; and (iii) an ensemble of *payoff functions*  $u_i: \prod_j \mathcal{A}_j \rightarrow \mathbb{R}$ , each determining the reward  $u_i(\alpha)$  of player  $i \in \mathcal{N}$  in a given *action profile*  $\alpha = (\alpha_1, \dots, \alpha_N)$ . Collectively, we will write  $\mathcal{A} = \prod_j \mathcal{A}_j$  for the game’s *action space* and  $\Gamma \equiv \Gamma(\mathcal{N}, \mathcal{A}, u)$  for the game with primitives as above.

During play, each player  $i \in \mathcal{N}$  may randomize their choice of action by playing a *mixed strategy*, i.e., a probability distribution  $x_i \in \mathcal{X}_i := \Delta(\mathcal{A}_i)$  over  $\mathcal{A}_i$  that selects  $\alpha_i \in \mathcal{A}_i$  with probability  $x_{i\alpha_i}$ . To lighten notation, we will identify  $\alpha_i \in \mathcal{A}_i$  with the mixed strategy that assigns all weight to  $\alpha_i$  (thus justifying the terminology “pure strategies”). Then, writing  $x = (x_i)_{i \in \mathcal{N}}$  for the players’ *strategy profile* and  $\mathcal{X} = \prod_i \mathcal{X}_i$  for the game’s *strategy space*, the players’ payoff functions may be extended to all of  $\mathcal{X}$  by setting  $u_i(x) := \mathbb{E}_{\alpha \sim x}[u_i(\alpha)] = \sum_{\alpha \in \mathcal{A}} u_i(\alpha) x_\alpha$  where, in a slight abuse of notation, we write  $x_\alpha$  for the joint probability of playing  $\alpha \in \mathcal{A}$  under  $x$ , i.e.,  $x_\alpha = \prod_i x_{i\alpha_i}$ . This randomized framework will be referred to as the *mixed extension* of  $\Gamma$  and we will denote it by  $\Delta(\Gamma)$ .

For concision, we will also write  $(x_i; x_{-i}) = (x_1, \dots, x_i, \dots, x_N)$  for the strategy profile where player  $i$  plays  $x_i \in \mathcal{X}_i$  against the strategy profile  $x_{-i} \in \prod_{j \neq i} \mathcal{X}_j$  of all other players (and likewise for pure strategies). In this notation, we also define each player’s *mixed payoff vector* as

$$v_i(x) = (u_i(\alpha_i; x_{-i}))_{\alpha_i \in \mathcal{A}_i} \quad (1)$$

so the payoff to player  $i \in \mathcal{N}$  under  $x \in \mathcal{X}$  becomes  $u_i(x) = \sum_{\alpha_i \in \mathcal{A}_i} u_i(\alpha_i; x_{-i}) x_{i\alpha_i} = \langle v_i(x), x_i \rangle$ . The *best-response correspondence* of player  $i \in \mathcal{N}$  is then defined as the set-valued mapping  $\text{br}_i: \mathcal{X} \rightrightarrows \mathcal{X}_i$  given by  $\text{br}_i(x) = \arg \max_{x'_i \in \mathcal{X}_i} u_i(x'_i; x_{-i})$  for all  $x \in \mathcal{X}$ . Extending this over all players, we will write  $\text{br} = \prod_i \text{br}_i$  for the product correspondence  $\text{br}(x) = \text{br}_1(x) \times \dots \times \text{br}_N(x)$ , and we will say that  $x^* \in \mathcal{X}$  is a *Nash equilibrium* (NE) if  $x^* \in \text{br}(x^*)$ . Equivalently, given that  $u_i(x'_i; x_{-i})$  is linear in  $x'_i$ , we conclude that  $x^*$  is a Nash equilibrium if and only if  $u_i(x^*) \geq u_i(\alpha_i; x_{-i}^*)$  for all  $\alpha_i \in \mathcal{A}_i$  and all  $i \in \mathcal{N}$ .

As a final point of note, if  $x^*$  is a Nash equilibrium where each player has a unique best response – that is,  $\text{br}_i(x^*) = \{x_i^*\}$  for all  $i \in \mathcal{N}$  – we will say that  $x^*$  is *strict* because, in this case,  $u_i(x^*) > u_i(x_i; x_{-i}^*)$  for all  $x_i \neq x_i^*, i \in \mathcal{N}$ . Among Nash equilibria, strict equilibria are the only ones that are “structurally robust” (in the sense that they remain invariant to small perturbations of the underlying game), so they play a particularly important role in game theory.

## 3 Regularized learning in games

Throughout our paper, we will consider iterative decision processes that unfold as follows:

1. At each stage  $t = 1, 2, \dots$ , every participating agent selects an action.
2. Agents receive a reward determined by their chosen actions and their individual payoff functions.
3. Based on this reward (or other feedback), the agents update their strategies and the process repeats.

In this online setting, a crucial requirement is the minimization of the players’ *regret*, i.e., the difference between a player’s cumulative payoff over time and the player’s best possible strategy in hindsight. Formally, if the players’ actions at each epoch  $t = 1, 2, \dots$  are collectively drawn by the probability distribution  $z_t \in \Delta(\mathcal{A})$ , the *regret* of each player  $i \in \mathcal{N}$  is defined as

$$\text{Reg}_i(T) = \max_{\alpha_i \in \mathcal{A}_i} \sum_{t=1}^T [u_i(\alpha_i; z_{-i,t}) - u_i(z_t)], \quad (2)$$

and we will say that player  $i$  has *no regret* if  $\text{Reg}_i(T) = o(T)$ .

One of the most widely used policies to achieve no-regret play is the so-called “*follow-the-regularized-leader*” (FTRL) family of algorithms and its variants [41, 42]. For completeness, we will work with a more general *regularized learning* (RL) template which allows us to simultaneously consider different types of feedback, strategy sampling policies, update structures, etc. To lighten notation below, we will drop the player index  $i \in \mathcal{N}$  when the meaning can be inferred from the context; also, to stress the distinction between “strategy-like” and “payoff-like” variables, we will write throughout  $\mathcal{Y}_i := \mathbb{R}^{\mathcal{A}_i}$  and  $\mathcal{Y} := \prod_i \mathcal{Y}_i$  for the game’s “*payoff space*”, in direct analogy to  $\mathcal{X}_i$  and  $\mathcal{X} = \prod_i \mathcal{X}_i$  for the game’s *strategy space*.

**3.1. The regularized learning template.** The general class of *regularized learning* (RL) methods that we will consider proceed in an iterative, two-stage fashion as follows:

$$\begin{aligned} \text{Aggregate payoff information:} \quad & Y_{i,t+1} = Y_{i,t} + \gamma_t \hat{v}_{i,t} \\ \text{Update choice probabilities:} \quad & X_{i,t+1} = Q_i(Y_{i,t+1}) \end{aligned} \tag{RL}$$

In the above:

1.  $X_{i,t} \in \mathcal{X}_i$  denotes the mixed strategy of player  $i$  at time  $t = 1, 2, \dots$
2.  $Y_{i,t} \in \mathcal{Y}_i$  is a “score vector” that measures the performance of the player’s actions over time.
3.  $Q_i: \mathcal{Y}_i \rightarrow \mathcal{X}_i$  is a “regularized best response” that maps score vectors to choice probabilities.
4.  $\hat{v}_{i,t}$  is a surrogate / approximation of the mixed payoff vector  $v_i(X_t)$  of player  $i$  at time  $t$ .
5.  $\gamma_t > 0$  is a step-size / sensitivity parameter of the form  $\gamma_t \propto 1/t^{\ell_\gamma}$  for some  $\ell_\gamma \in [0, 1]$ .

In words, at each stage of the process, every player  $i \in \mathcal{N}$  observes – or otherwise estimates – a proxy  $\hat{v}_{i,t}$  of their individual payoff vector; subsequently, players augment their actions’ scores based on this information, they select a mixed strategy via the regularized choice map  $Q_i$ , and the process repeats. To streamline our presentation, we discuss in detail the precise definition of  $\hat{v}$  and  $Q$  in Sections 3.2 and 3.3 below, and we present a series of examples of (RL) in Section 3.4 right after.

**3.2. Aggregating payoff information.** As noted above, the main idea of regularized learning is to track the players’ payoff vector  $v(X_t)$ . Importantly, there are several different modeling choices that can be made here: players may have direct access to their payoff vectors (in the full information setting), or some noisy approximation obtained by an inner randomization of the algorithm (e.g., when they receive information on their pure actions); they may have to recreate their payoff vectors altogether (as in the bandit setting), or their estimates may be based on a strategy other than the one they actually played (as in the case of optimistic algorithms). In all these cases, the surrogate vector  $\hat{v}_t$  can be written concisely as

$$\hat{v}_t = v(X_t) + U_t + b_t \tag{3}$$

where  $b_t = \mathbb{E}[\hat{v}_t | \mathcal{F}_t] - v(X_t)$  and  $U_t = \hat{v}_t - \mathbb{E}[\hat{v}_t | \mathcal{F}_t]$  respectively denote the offset and the random error of  $\hat{v}_t$  relative to  $v(X_t)$ . To streamline our presentation, we will also assume that  $\|b_t\| = \mathcal{O}(1/t^{\ell_b})$  and  $\|U_t\| = \mathcal{O}(t^{\ell_\sigma})$  for some  $\ell_b, \ell_\sigma \geq 0$ ; we discuss the specifics of these bounds later in the paper.

**3.3. From scores to strategies.** Regarding the “scores-to-strategies” step of (RL), we will follow the classical approach of Shalev-Shwartz [41] and assume that each player is employing a *choice map* – or *regularized best response* – of the general form

$$Q_i(y_i) = \arg \max_{x_i \in \mathcal{X}_i} \{ \langle y_i, x_i \rangle - h_i(x_i) \} \quad \text{for all } y_i \in \mathcal{Y}_i. \tag{4}$$

In the above, the *regularizer*  $h_i: \mathcal{X}_i \rightarrow \mathbb{R}$  acts as a penalty that smooths out the “hard” argmax correspondence  $y_i \mapsto \arg \max_{x_i \in \mathcal{X}_i} \langle y_i, x_i \rangle$ . Accordingly, instead of following the “leader” (i.e., playing the strategy with the highest propensity score), players follow the “regularized leader” – that is, they allow for a certain degree of uncertainty in their choice of strategy [9, 28, 41, 42].

To ease notation, we will work with kernelized regularizers of the form  $h_i(x_i) = \sum_{\alpha_i \in \mathcal{A}_i} \theta(x_i \alpha_i)$  for some continuous function  $\theta: [0, 1] \rightarrow \mathbb{R}$  with  $\inf_{z \in (0,1)} \theta''(z) > 0$ . We will also say that the players’ regularizers are *steep* if  $\lim_{z \rightarrow 0^+} \theta'(z) = -\infty$ , and non-steep otherwise.

**Example 3.1.** A standard family of kernelized regularizers is given by  $\theta(z) = z^\rho / [\rho(\rho - 1)]$  for  $\rho \in (0, 1) \cup (1, 2]$  and  $\theta(z) = z \log z$  for  $\rho = 1$  [9, 26, 28, 49]. This family includes:

- For  $\rho = 2$ , the quadratic regularizer  $\theta(z) = z^2/2$ , which yields the Euclidean projection map

$$Q_i(y_i) = \Pi_{\mathcal{X}_i}(y_i) \equiv \arg \min_{x_i \in \mathcal{X}_i} \|y_i - x_i\|_2. \tag{5}$$

• For  $\rho = 1$ , the *entropic regularizer*  $\theta(z) = z \log z$ , which induces the *logit choice map*

$$Q_i(y_i) = \Lambda_i(y_i) \equiv \frac{(\exp(y_i \alpha_i))_{\alpha_i \in \mathcal{A}_i}}{\sum_{\alpha_i \in \mathcal{A}_i} \exp(y_i \alpha_i)} \quad (6)$$

• For  $\rho = 1/2$ , the *fractional power regularizer*  $\theta(z) = -4\sqrt{z}$  that underlies the TSALLIS-INF algorithm of [1, 49] (see also Section 3.4 below). ♦

**3.4. Specific algorithms.** We now proceed to discuss some archetypal examples of (RL).

**Algorithm 1** (Follow the regularized leader). The standard “*follow-the-regularized-leader*” (FTRL) method of Shalev-Shwartz & Singer [42] is obtained when players observe their full payoff vectors, that is,  $\hat{v}_{i,t} = v_i(X_t)$ . In this case, (RL) boils down to the deterministic update rule

$$Y_{i,t+1} = Y_{i,t} + \gamma_t v_i(X_t) \quad X_{i,t+1} = Q_i(Y_{i,t+1})$$

or, more explicitly

$$X_{i,t+1} = \arg \max_{x_i \in \mathcal{X}_i} \left\{ \sum_{s=1}^t \gamma_s u_i(x_i; X_{-i,s}) - h_i(x_i) \right\} \quad (\text{FTRL})$$

For a detailed discussion of (FTRL), see [9, 26, 41]. We only note here that, as a special case, when (FTRL) is run with the logit choice setup of Eq. (6), a standard calculation yields the seminal *exponential/multiplicative weights* algorithm – or HEDGE [4, 27, 46] – namely

$$X_{i\alpha_i,t+1} = \frac{X_{i\alpha_i,t} \exp(\gamma_t u_i(\alpha_i; X_{-i,t}))}{\sum_{\alpha'_i \in \mathcal{A}_i} X_{i\alpha'_i,t} \exp(\gamma_t u_i(\alpha'_i; X_{-i,t}))} \quad (\text{HEDGE})$$

For an appetizer to the literature on (HEDGE), see [2, 9, 10, 26, 41] and references therein. ♦

**Algorithm 2** (Optimistic FTRL). A notable variant of FTRL – originally due to Popov [35] and subsequently popularized by Rakhlin & Sridharan [36, 37] – is the so-called *optimistic FTRL* method. This scheme employs an “optimistic” correction intended to anticipate future steps, and it updates as

$$Y_{i,t+1} = Y_{i,t} + \gamma_t [2v_i(X_t) - v_i(X_{t-1})] \quad (\text{Opt-FTRL})$$

with  $X_{i,t} = Q_i(Y_{i,t})$ . As a special case, if (Opt-FTRL) is run with the logit choice map (6), we obtain the familiar update rule known as *optimistic multiplicative weights* (OMW) [13, 36, 37, 43].

Compared to (FTRL), the gain vector  $\hat{v}_t = 2v(X_t) - v(X_{t-1})$  of (Opt-FTRL) has offset  $b_t = v(X_t) - v(X_{t-1})$  relative to  $v(X_t)$ . Thus, even though (Opt-FTRL) assumes full access to the players’ mixed payoff vectors, it uses this information differently than (FTRL): in particular, the offset of (Opt-FTRL) is non-zero *by design*, not because of some systematic error in the payoff measurement process. ♦

Now, up to this point, we have not detailed how players might observe their full, mixed payoff vectors. This assumption simplifies the analysis immensely, but it is not realistic in applications to e.g., online advertising and network science, where players may only be able to observe their realized payoffs, and have no information about the strategies of other players or actions they did not play. On that account, we describe below a range of *payoff-based* policies where players estimate their counterfactual, “what-if” payoffs *indirectly*.

The most common way to achieve this is via the *importance-weighted estimator*

$$\text{IWE}_{i\alpha_i}(x) = \frac{\mathbb{1}\{\hat{\alpha}_i = \alpha_i\}}{x_{i\alpha_i}} u_i(\hat{\alpha}) \quad \text{for all } \alpha_i \in \mathcal{A}_i, i \in \mathcal{N}, \quad (\text{IWE})$$

where  $x \in \mathcal{X}$  is the players’ strategy profile, and  $\hat{\alpha} \in \mathcal{A}$  is drawn according to  $x$ . This estimator is at the heart of the online learning literature [9, 10, 26, 41] and it leads to the following methods:

**Algorithm 3** (Bandit FTRL). Plugging (IWE) directly into (RL) yields the *bandit FTRL* policy

$$Y_{i,t+1} = Y_{i,t} + \gamma_t \text{IWE}_i(\hat{X}_t) \quad X_{i,t+1} = Q_i(Y_{i,t+1}) \quad (\text{B-FTRL})$$

where (IWE) is sampled at the mixed strategy profile

$$\hat{X}_{i,t} = (1 - \delta_t) X_{i,t} + \delta_t \text{unif}_{\mathcal{A}_i} \quad (7)$$

for some “explicit exploration” parameter  $\delta_t \propto 1/t^{\ell_\delta}$ ,  $\ell_\delta > 0$ , which specifies the mix between  $X_{i,t}$  and the uniform distribution  $\text{unif}_{\mathcal{A}_i}$  on  $\mathcal{A}_i$ . As we discuss in the sequel, this combination of (IWE) with the explicit exploration mechanism (7) means that the surrogate payoff vector  $\hat{v}_t = \text{IWE}(\hat{X}_t)$  used to update (B-FTRL) has offset and noise bounded respectively as  $b_t = \mathcal{O}(\delta_t)$  and  $U_t = \mathcal{O}(1/\delta_t)$ .

Two special cases of (B-FTRL) that have attracted significant attention in the literature are:

- 225 1. The *exponential weights algorithm for exploration and exploitation* (EXP3) [5, 10, 26], obtained  
 226 by running (B-FTRL) with the logit choice map (6).  
 227 2. The *Tsallis implicitly normalized forecaster* (TSALLIS-INF) [1, 3, 48, 49] that was proposed as a  
 228 more efficient alternative to EXP3, and which updates as

$$X_{i,t} = \arg \max_{x_i \in \mathcal{X}_i} \left\{ \langle Y_{i,t}, x_i \rangle + 4 \sum_{\alpha_i \in \mathcal{A}_i} \sqrt{x_{i,\alpha_i}} \right\} \quad (\text{TSALLIS-INF})$$

229 i.e., as (B-FTRL) with the fractional power regularizer  $\theta(z) = -4\sqrt{z}$  of Example 3.1. ♦

230 For illustration purposes, we provide some more examples of (RL) in Appendix B.

## 231 4 First results: resilience to strategic deviations

232 We are now in a position to begin our analysis of the rationality properties of the players' long-  
 233 run behavior under (RL). To that end, we should first note that no-regret play may *still* lead to  
 234 counterintuitive and highly non-rationalizable outcomes, e.g., with all players selecting dominated  
 235 strategies for all time. The example below is adapted from Viossat & Zapechelnyuk [45]:

236 **Example 4.1.** Consider the  $4 \times 4$  symmetric 2-player game with payoff bimatrix

|   | A         | B            | C         | D            |
|---|-----------|--------------|-----------|--------------|
| A | (1, 1)    | (1, 2/3)     | (0, 0)    | (0, -1/3)    |
| B | (2/3, 1)  | (2/3, 2/3)   | (-1/3, 0) | (-1/3, -1/3) |
| C | (0, 0)    | (0, -1/3)    | (1, 1)    | (1, 2/3)     |
| D | (-1/3, 0) | (-1/3, -1/3) | (2/3, 1)  | (2/3, 2/3)   |

237 In this game, B and D are strictly dominated for both players by their stronger “twins” (A and C  
 238 respectively). However, it is easy to check that if both players choose between (B, B) and (D, D) with  
 239 probability 1/2 each, the resulting distribution of play  $z \in \Delta(\mathcal{A})$  satisfies  $u_i(\alpha_i; z_{-i}) - u_i(z) \leq -1/6$   
 240 for all  $\alpha_i \in \{A, B, C, D\}$ ,  $i = 1, 2$ . As a result, the players' regret under  $z_t \equiv z$  is *negative*, even  
 241 though both players play strictly dominated strategies at all times. ♦

242 The example above shows that the no-regret property does not suffice to exclude non-rationalizable  
 243 outcomes by itself. In addition, it also shows that predictions based on correlated play are not always  
 244 appropriate for describing the players' behavior under (RL): the end-state of any regularized learning  
 245 algorithm will be a closed connected set of mixed strategies, so it is not possible to play *only* (B, B)  
 246 or (D, D) in the long run. We are thus led to the following natural question: *What are the rationality*  
 247 *properties of long-run play under (RL)? Is the players' behavior robust to strategic deviations?*

248 To study this question formally, we will focus on the *limit set*  $\mathcal{L}(X)$  of  $X_t$  under (RL), viz.

$$\mathcal{L}(X) := \bigcap_t \text{cl}\{X_s : s \geq t\} \equiv \{\hat{x} \in \mathcal{X} : X_{t_k} \rightarrow \hat{x} \text{ for some subsequence } X_{t_k} \text{ of } X_t\}. \quad (8)$$

249 In words,  $\mathcal{L}(X)$  is the set of limit points of  $X_t$  or, equivalently, the *smallest* subset of  $\mathcal{X}$  to which  
 250  $X_t$  converges. Clearly, the simplest instance of a limit set is when  $\mathcal{L}(X)$  is a singleton, i.e., when  
 251  $X_t$  converges to a point. This case has attracted significant interest in the literature: for example, if  
 252  $\mathcal{L}(X) = \{x^*\}$  then, for certain special cases of (RL), it is known that  $x^*$  is a Nash equilibrium of  $\Gamma$   
 253 [29]. However, beyond this relatively simple regime, the structure of the limit sets of (RL) could be  
 254 arbitrarily complicated and their rationality properties are not well-understood.

255 With this in mind, as a first attempt to study whether the long-run behavior of (RL) is “robust to  
 256 strategic deviations”, we will consider the notion of *resilience*, as defined below:

257 **Definition 1.** A closed subset  $\mathcal{S}$  of  $\mathcal{X}$  is *resilient to strategic deviations* – or simply *resilient* – if, for  
 258 every deviation  $x_i \in \mathcal{X}_i$  of every player  $i \in \mathcal{N}$ , we have  $u_i(x^*) \geq u_i(x_i, x_{-i}^*)$  for some  $x^* \in \mathcal{S}$ .

259 Informally,  $\mathcal{S}$  is resilient if every unilateral deviation from  $\mathcal{S}$  is deterred by some (possibly different)  
 260 element thereof. In particular, if  $\mathcal{S}$  is a singleton, we immediately recover the definition of a Nash  
 261 equilibrium; beyond this base case, other examples include the set of undominated strategies of a  
 262 game, the support face of the equilibria of two-player zero-sum games, etc.

263 Importantly, as we show below, the limit sets of (RL) are almost surely resilient *in all games*:

264 **Theorem 1.** Let  $X_t$ ,  $t = 1, 2, \dots$ , be the sequence of play generated by (RL) with step-size / gain  
 265 parameters  $\ell_\gamma > 2\ell_\sigma$  and  $\ell_b > 0$ . Then, with probability 1, the limit set  $\mathcal{L}(X)$  of  $X_t$  is resilient.

266 *Proof sketch.* The proof of [Theorem 1](#) boils down to two interleaved arguments that we detail in  
 267 [??](#). The first hinges on showing that, if  $\mathbb{P}(\mathcal{L}(X) = \mathcal{S}) > 0$  for some *non-random*  $\mathcal{S} \subseteq \mathcal{X}$ ,  $\mathcal{S}$   
 268 must be resilient. This is argued by contradiction: if  $p_i \in \mathcal{X}_i$  is a unilateral deviation violating  
 269 [Definition 1](#), we must also have  $\liminf_{t \rightarrow \infty} [u_i(p_i; X_{-i,t}) - u_i(X_t)] > 0$  with positive probability.  
 270 However, the existence of a strategy that consistently outperforms  $X_t$  runs contrary to the fact that  
 271 strategies that [\(RL\)](#) selects against underperforming strategies. We make this intuition precise via  
 272 an energy argument that leverages a series of results from martingale limit theory (which is where  
 273 the requirements for  $\gamma_t$ ,  $b_t$  and  $U_t$  come in). Then, to get the stronger statement that the *random* set  
 274  $\mathcal{L}(X)$  is resilient w.p.1, we show that the above remains true if  $p_i$  is replaced by a deviation  $q_i$  which  
 275 is close enough to  $p_i$  and has *rational* entries. Since there is a countable number of such profiles,  
 276 we can use a union bound on an enumeration of the rationals to isolate a deviation witnessing the  
 277 negation of [Definition 1](#) and apply our argument for non-random sets to conclude our proof. ■

278 [Theorem 1](#) is our first universal guarantee for [\(RL\)](#), so some remarks are in order. First, we should  
 279 point out that the requirements  $\ell_b > 0$  and  $2\ell_\sigma < \ell_\gamma$  are a priori *implicit* because they depend on the  
 280 offset and magnitude statistics of the feedback sequence  $\hat{v}_t$ . However, in most learning algorithms,  
 281 these quantities are under the *explicit* control of the players: for example, as we show in [Appendix B](#),  
 282 [Algorithm 2](#) has  $\ell_b = \ell_\gamma$  while, for [Algorithm 3](#), we have  $\ell_b = \ell_\sigma = \ell_\delta$ . In this way, when instantiated  
 283 to [Algorithms 1–3](#) (and special cases thereof), [Theorem 1](#) yields the following corollary:

284 **Corollary 1.** *Suppose that [Algorithms 1–3](#) are run with  $\ell_\gamma \in (0, 1]$  and, for [Algorithm 3](#),  $\ell_\delta \in$   
 285  $(0, \ell_\gamma/2)$ . Then, with probability 1, the limit set  $\mathcal{L}(X)$  of  $X_t$  is resilient.*

286 Now, since [Theorem 1](#) applies to all games, it would seem to provide a universally positive answer  
 287 to whether [\(RL\)](#) is robust to strategic deviations. However, this is not so: a direct calculation shows  
 288 that the face of  $\mathcal{X}$  that is spanned by the dominated strategies  $(B, B)$  and  $(D, D)$  of [Example 4.1](#)  
 289 is resilient, so [Theorem 1](#) cannot exclude convergence to a set where dominated strategies survive.  
 290 Thus, just like no-regret play, the notion of resilience does not suffice by itself to capture the idea  
 291 of rational behavior. This is because, albeit natural, resilience is too lax to provide a meaningful  
 292 link between robustness to unilateral deviations – a *game-theoretic* requirement – and stability under  
 293 regularized learning – a *dynamic* requirement. We address this question in detail in the next section.

## 294 5 A characterization of strategic stability under regularized learning

295 Similar to the set of pure strategies that arise from no-regret play, the main limitation of resilience  
 296 is that a payoff-improving deviation may be countered by an action profile where the deviator also  
 297 switched to a *different* strategy; in other words, resilience is not a *self-enforcing* barrier to deviations.  
 298 In view of this, we will focus below on a much more stringent criterion of strategic stability, namely  
 299 that *any* deviation from the set in question incur a cost to the deviating agent.

300 **Club sets.** The above idea can be made precise as follows: First, define the *better-reply correspon-*  
 301 *dence* of player  $i \in \mathcal{N}$  as  $\text{btr}_i(x) = \{x'_i \in \mathcal{X}_i : u_i(x'_i; x_{-i}) \geq u_i(x)\}$ , and write  $\text{btr} = \prod_i \text{btr}_i$  for  
 302 the product correspondence  $\text{btr}(x) = \text{btr}_1(x) \times \cdots \times \text{btr}_N(x)$ . [In words,  $\text{btr}_i$  assigns to each  
 303  $x \in \mathcal{X}$  those strategies of player  $i$  that are (weakly) better against  $x$  than  $x_i$ .] In addition, given a  
 304 product of pure strategies  $\mathcal{C} = \prod_{i \in \mathcal{N}} \mathcal{C}_i$  with  $\mathcal{C}_i \subseteq \mathcal{A}_i$  for all  $i \in \mathcal{N}$ , let  $\mathcal{S} = \Delta(\mathcal{C})$  denote the span of  
 305  $\mathcal{C}$ , and let  $\mathcal{P}(\mathcal{X})$  denote the collection of all such sets. We then say that  $\mathcal{S} \in \mathcal{P}(\mathcal{X})$  is *closed under*  
 306 *better replies* – a *club set* for short – if it is closed under  $\text{btr}$ , i.e.,  $\text{btr}(\mathcal{S}) \subseteq \mathcal{S}$ ; finally,  $\mathcal{S}$  is said to  
 307 be *minimally club* (m-club) if it does not admit a proper club subset.

308 Of course, the entire strategy space  $\mathcal{X}$  is closed under better replies so, a priori, club sets could also  
 309 contain dominated strategies and/or other non-rationalizable outcomes. By contrast, *minimal* club  
 310 sets are much more rigid in their relation to rational behavior because any unilateral deviation from  
 311 an m-club set is *costly*, and m-club sets are *minimal* in this regard. On that account, m-club sets can  
 312 be seen as *the closest setwise analogue to strict Nash equilibria*.

313 This analogy is accentuated further by the following properties of m-club sets (all due to Ritzberger  
 314 & Weibull [38], who introduced the concept):

- 315 1. Every game admits an m-club set; and if this set is a singleton, then it is a *strict* Nash equilibrium.

- 316 2. Any  $m$ -club set  $\mathcal{S}$  is *fixed* under better replies, that is,  $\text{btr}(\mathcal{S}) = \mathcal{S}$  (implying in turn that  $\mathcal{S}$  cannot  
 317 contain any dominated strategies, including iteratively dominated ones).  
 318 3. Any  $m$ -club set  $\mathcal{S}$  contains an *essential equilibrium component*, i.e., a component of Nash equilibria  
 319 such that every small perturbation of the game admits a nearby equilibrium; in addition, this  
 320 component has *full support* on  $\mathcal{S}$ , i.e., it employs all pure strategy profiles that lie in  $\mathcal{S}$ .<sup>1</sup>

321 Going back to our online learning setting, the above leads to the following natural set of questions:

322 *Are club sets (minimal or not) stable under the dynamics of regularized learning?*  
 323 *Are they attracting? And, if so, are they the only such sets?*

324 Any answer to these questions – positive or negative – would be an important step in delineating the  
 325 relation between *strategic stability* (in the above sense) and *dynamic stability* under (RL). To that  
 326 end, we start by formalizing some notions of dynamic stability that will be central in the sequel:

327 **Definition 2.** Fix some subset  $\mathcal{S}$  of  $\mathcal{X}$  and a tolerance level  $\epsilon > 0$ . We then say that  $\mathcal{S}$  is:

- 328 1. *Stochastically stable* if, for every neighborhood  $\mathcal{U}$  of  $\mathcal{S}$  in  $\mathcal{X}$ , there exists a neighborhood  $\mathcal{U}_1$  of  $\mathcal{S}$   
 329 such that

$$\mathbb{P}(X_t \in \mathcal{U} \text{ for all } t = 1, 2, \dots) \geq 1 - \epsilon \quad \text{whenever } X_1 \in \mathcal{U}_1. \quad (9)$$

- 330 2. *Stochastically attracting* if there exists a neighborhood  $\mathcal{U}_1$  of  $\mathcal{S}$  such that

$$\mathbb{P}(\lim_{t \rightarrow \infty} \text{dist}(X_t, \mathcal{S}) = 0) \geq 1 - \epsilon \quad \text{whenever } X_1 \in \mathcal{U}_1. \quad (10)$$

- 331 3. *Stochastically asymptotically stable* if it is stochastically stable and attracting.  
 332 4. *Irreducibly stable* if  $\mathcal{S}$  is stochastically asymptotically stable and it does not admit a strictly smaller  
 333 stochastically asymptotically subset  $\mathcal{S}'$  with  $\text{supp}(\mathcal{S}') \subsetneq \text{supp}(\mathcal{S})$ .

334 With all this in hand, our main result below provides a sharp characterization of strategic stability in  
 335 the context of regularized learning:

336 **Theorem 2.** Fix some set  $\mathcal{S} \in \mathcal{P}(\mathcal{X})$  and suppose that (RL) is run with a steep regularizer and  
 337 step-size/gain parameters  $\ell_\gamma \in [0, 1]$ ,  $\ell_b > 0$ , and  $\ell_\sigma < 1/2$ . Then:

- 338 1.  $\mathcal{S}$  is stochastically asymptotically stable under (RL) if and only if it is a club set.  
 339 2.  $\mathcal{S}$  is irreducibly stable under (RL) if and only if it is an  $m$ -club set.

340 In addition, we also get the following convergence rate estimates for club sets:

341 **Theorem 3.** Let  $\mathcal{S} \in \mathcal{P}(\mathcal{X})$  be a club set, and let  $X_t$ ,  $t = 1, 2, \dots$ , be the sequence of play generated  
 342 by (RL) with parameters  $\ell_\gamma \in [0, 1]$ ,  $\ell_b > 0$ , and  $\ell_\sigma < 1/2$ . Then, for all  $\epsilon > 0$ , there exists an (open,  
 343 unbounded) initialization domain  $\mathcal{D} \subseteq \mathcal{Y}$  such that, with probability at least  $1 - \epsilon$ , we have

$$\text{dist}(X_t, \mathcal{S}) \leq C\varphi\left(c_1 - c_2 \sum_{s=1}^t \gamma_s\right) \quad \text{whenever } Y_1 \in \mathcal{D} \quad (11)$$

344 where  $C, c_1, c_2$  are constants ( $C, c_2 > 0$ ), and the rate function  $\varphi$  is given by  $\varphi(z) = (\theta')^{-1}(z)$  if  
 345  $z > \lim_{z \rightarrow 0^+} \theta'(z)$ , and  $\varphi(z) = 0$  otherwise.

346 Specifically, if we instantiate Theorem 3 to Algorithms 1–3, we get the explicit estimates:

347 **Corollary 2.** Suppose that Algorithms 1–3 are run with  $\ell_\gamma \in [0, 1]$  and, for Algorithm 3,  $\ell_\delta \in$   
 348  $(0, 1/2)$ . Then, with notation as in Theorem 3,  $X_t$  converges to  $\mathcal{S}$  at a rate of

$$\text{dist}(X_t, \mathcal{S}) \leq C \cdot \begin{cases} [1 - c \sum_{s=1}^t \gamma_s]_+ & \text{if } \theta(z) = z^2/2 & \# \text{quadratic regularization} \\ \exp(-c \sum_{s=1}^t \gamma_s) & \text{if } \theta(z) = z \log z & \# \text{entropic regularization} \\ 1/(c + \sum_{s=1}^t \gamma_s)^2 & \text{if } \theta(z) = -4\sqrt{z} & \# \text{fractional regularization} \end{cases} \quad (12)$$

349 for positive constants  $C, c > 0$ . In particular, the projection-based variants of Algorithms 1–3  
 350 converge to  $m$ -club sets in a *finite* number of steps.

<sup>1</sup>Formally, a component  $\mathcal{X}^*$  of Nash equilibria of  $\Gamma$  is *essential* if, for all  $\epsilon > 0$ , there exists  $\delta > 0$  such that any perturbation of the payoffs of  $\Gamma$  by at most  $\delta$  produces a Nash equilibrium that is  $\epsilon$ -close to  $\mathcal{X}^*$  [44]. This property – known as “*essentiality*” – has a long history as one of the strictest setwise solution refinements in game theory; in particular, it satisfies all the seminal *strategic stability* requirements of Kohlberg & Mertens [25], including robustness to strategic payoff perturbations. For an in-depth discussion, see van Damme [44].

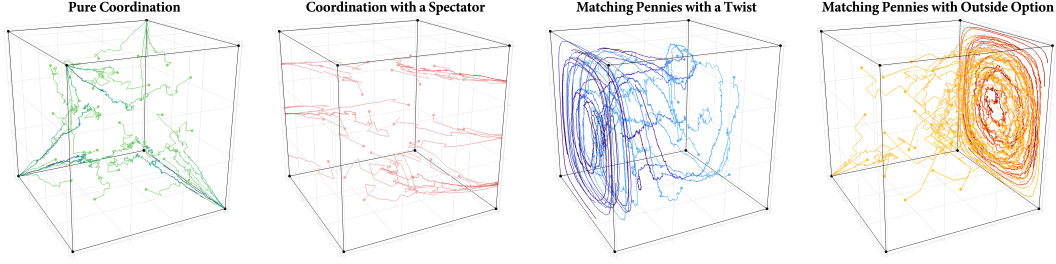

**Figure 1:** The long-run behavior of EXP3 (Algorithm 3) in four representative  $2 \times 2 \times 2$  games. In all cases, the dynamics converge to m-club sets, either *strict equilibria* themselves, or spanning an *essential component* of Nash equilibria. The details of the numerics and the games being played are provided in the appendix.

*Proof sketch.* The proof of Theorems 2 and 3 is quite involved so we defer it to Appendix D. At a high level, it hinges on constructing a family of “primal-dual” energy functions, one per pure deviation from the set  $\mathcal{S}$  under study. If unilateral deviations from  $\mathcal{S}$  incur a cost to the deviator (that is, if  $\mathcal{S}$  is club), these energy functions can be “bundled together” to produce a suitable Lyapunov-like function for  $\mathcal{S}$ . In more detail, the minimization of each individual energy function implies that the score variable  $Y_t$  of (RL) diverges along an “astral direction” in the payoff space  $\mathcal{Y}$  – i.e., it escapes to infinity along the interior of a certain convex cone of  $\mathcal{Y}$  [16]. Because this minimization occurs at infinity, the aggregation of offsets and random errors in (RL) affords some extra “wiggle room” in our martingale analysis, so we are able to show that  $X_t = Q(Y_t)$  remains close to  $\mathcal{S}$  under a much wider range of parameters compared to Theorem 1. Then, a series of convex analysis arguments in the spirit of [28] coupled with the definition of  $Q$  allows us to show that the escape of  $Y_t$  along the intersection of all these cones implies convergence to  $\mathcal{S}$  at the specified rate.

On the converse side, if an asymptotically stable set is not club, we can find a non-costly (and possibly profitable) deviation  $z$  from  $\mathcal{S}$  which is selected against by (RL). However, this extinction runs contrary to the reinforcement of better replies under (RL), an argument which can be made precise by applying the martingale law of large numbers to  $\langle Y_t, z \rangle$  [21]. The irreducible stability of m-club sets then follows by invoking this criterion reductively for any potentially stable subset  $\mathcal{S}'$  of  $\mathcal{S}$ . ■

**Discussion and remarks.** Theorems 2 and 3 are our main results linking dynamic and strategic stability, so we conclude with a series of remarks. First, we should note that Theorem 2 can be summed up as follows: *a product of pure strategies is (minimally) closed under better replies if and only if its span is (irreducibly) stable under regularized learning*. Importantly, this equivalence is based solely on the game’s payoff data: it does not depend on the specific choices underlying (RL), including the choice map employed by each player, whether some players are using an optimistic adjustment or not, if they have access to their full payoff vectors, etc. As such, this equivalence provides a crisp operational criterion for identifying which pure strategy combinations ultimately persist under regularized learning – and, via Theorem 3, *how fast* this identification takes place.

In this light, Theorem 2 essentially states that the only robust prediction that can be made for the outcome of a regularized learning process is (minimal) closedness under better replies. This interpretation has significant cutting power for the emergence of rational behavior. To begin, in terms of equilibrium play, it effortlessly implies that a pure strategy profile is stochastically asymptotically stable under (RL) if and only if it is a strict Nash equilibrium. A version of this equivalence was only recently proved in [17] and [19] (in continuous and discrete time respectively), so Theorem 2 can be seen as a far-reaching generalization of these recent results. More to the point, since every m-club set  $\mathcal{S}$  contains an essential equilibrium component that is fully supported in  $\mathcal{S}$ , Theorem 2 also provides an important link between dynamic and structural stability: if an equilibrium – or a component of equilibria – is not robust to perturbations of the underlying game, *it cannot be robustly identified by a regularized learning process* (and vice versa). This remark is of particular importance for extensive-form games as such games often have non-generic equilibrium components that cannot be treated otherwise by the existing theory.

Finally, we should stress that Theorems 2 and 3 guarantee convergence even with a constant step-size. Together with the finite-time convergence guarantees of Corollary 2 for projection-based methods, this feature is a testament to the robustness of club sets as, in the presence of uncertainty, convergence almost always requires a vanishing step-size which can slow convergence down to a crawl. We find this robust convergence landscape particularly intriguing for future research on the topic.

- 396 [1] Abernethy, J., Lee, C., and Tewari, A. Fighting bandits with a new kind of smoothness. In *NIPS '15: Proceedings of the 29th International Conference on Neural Information Processing Systems*, 2015.
- 397
- 398 [2] Arora, S., Hazan, E., and Kale, S. The multiplicative weights update method: A meta-algorithm and applications. *Theory of Computing*, 8(1):121–164, 2012.
- 399
- 400 [3] Audibert, J.-Y. and Bubeck, S. Regret bounds and minimax policies under partial monitoring. *Journal of Machine Learning Research*, 11:2635–2686, 2010.
- 401
- 402 [4] Auer, P., Cesa-Bianchi, N., Freund, Y., and Schapire, R. E. Gambling in a rigged casino: The adversarial multi-armed bandit problem. In *Proceedings of the 36th Annual Symposium on Foundations of Computer Science*, 1995.
- 403
- 404
- 405 [5] Auer, P., Cesa-Bianchi, N., Freund, Y., and Schapire, R. E. The nonstochastic multiarmed bandit problem. *SIAM Journal on Computing*, 32(1):48–77, 2002.
- 406
- 407 [6] Basu, K. and Weibull, J. W. Strategy subsets closed under rational behavior. *Economics Letters*, 36: 141–146, 1991.
- 408
- 409 [7] Bauschke, H. H., Borwein, J. M., and Combettes, P. L. Bregman monotone optimization algorithms. *SIAM Journal on Control and Optimization*, 42(2):596–636, 2003.
- 410
- 411 [8] Benaïm, M. Dynamics of stochastic approximation algorithms. In Azéma, J., Émery, M., Ledoux, M., and Yor, M. (eds.), *Séminaire de Probabilités XXXIII*, volume 1709 of *Lecture Notes in Mathematics*, pp. 1–68. Springer Berlin Heidelberg, 1999.
- 412
- 413
- 414 [9] Bubeck, S. and Cesa-Bianchi, N. Regret analysis of stochastic and nonstochastic multi-armed bandit problems. *Foundations and Trends in Machine Learning*, 5(1):1–122, 2012.
- 415
- 416 [10] Cesa-Bianchi, N. and Lugosi, G. *Prediction, Learning, and Games*. Cambridge University Press, 2006.
- 417 [11] Chotibut, T., Falniowski, F., Misiurewicz, M., and Piliouras, G. Family of chaotic maps from game theory. *Dynamical Systems*, 2020.
- 418
- 419 [12] Cressman, R. *Evolutionary Dynamics and Extensive Form Games*. The MIT Press, 2003.
- 420 [13] Daskalakis, C. and Panageas, I. Last-iterate convergence: Zero-sum games and constrained min-max optimization. In *ITCS '19: Proceedings of the 10th Conference on Innovations in Theoretical Computer Science*, 2019.
- 421
- 422
- 423 [14] Daskalakis, C., Ilyas, A., Syrgkanis, V., and Zeng, H. Training GANs with optimism. In *ICLR '18: Proceedings of the 2018 International Conference on Learning Representations*, 2018.
- 424
- 425 [15] Demichelis, S. and Ritzberger, K. From evolutionary to strategic stability. *Journal of Economic Theory*, 113:51–75, 2003.
- 426
- 427 [16] Dudík, M., Schapire, R. E., and Telgarsky, M. Convex analysis at infinity: An introduction to astral space. <https://arxiv.org/abs/2205.03260>, 2022.
- 428
- 429 [17] Flokas, L., Vlatakis-Gkaragkounis, E. V., Lianas, T., Mertikopoulos, P., and Piliouras, G. No-regret learning and mixed Nash equilibria: They do not mix. In *NeurIPS '20: Proceedings of the 34th International Conference on Neural Information Processing Systems*, 2020.
- 430
- 431
- 432 [18] Fudenberg, D. and Tirole, J. *Game Theory*. The MIT Press, 1991.
- 433 [19] Giannou, A., Vlatakis-Gkaragkounis, E. V., and Mertikopoulos, P. Survival of the strictest: Stable and unstable equilibria under regularized learning with partial information. In *COLT '21: Proceedings of the 34th Annual Conference on Learning Theory*, 2021.
- 434
- 435
- 436 [20] Gidel, G., Berard, H., Vignoud, G., Vincent, P., and Lacoste-Julien, S. A variational inequality perspective on generative adversarial networks. In *ICLR '19: Proceedings of the 2019 International Conference on Learning Representations*, 2019.
- 437
- 438
- 439 [21] Hall, P. and Heyde, C. C. *Martingale Limit Theory and Its Application*. Probability and Mathematical Statistics. Academic Press, New York, 1980.
- 440
- 441 [22] Hannan, J. Approximation to Bayes risk in repeated play. In Dresher, M., Tucker, A. W., and Wolfe, P. (eds.), *Contributions to the Theory of Games, Volume III*, volume 39 of *Annals of Mathematics Studies*, pp. 97–139. Princeton University Press, Princeton, NJ, 1957.
- 442
- 443
- 444 [23] Hofbauer, J. and Sigmund, K. Evolutionary game dynamics. *Bulletin of the American Mathematical Society*, 40(4):479–519, July 2003.
- 445
- 446 [24] Juditsky, A., Nemirovski, A. S., and Tauvel, C. Solving variational inequalities with stochastic mirror-prox algorithm. *Stochastic Systems*, 1(1):17–58, 2011.
- 447
- 448 [25] Kohlberg, E. and Mertens, J.-F. On the strategic stability of equilibria. *Econometrica*, 54(5):1003–1037, September 1986.
- 449
- 450 [26] Lattimore, T. and Szepesvári, C. *Bandit Algorithms*. Cambridge University Press, Cambridge, UK, 2020.

- [27] Littlestone, N. and Warmuth, M. K. The weighted majority algorithm. *Information and Computation*, 108(2):212–261, 1994.
- [28] Mertikopoulos, P. and Sandholm, W. H. Learning in games via reinforcement and regularization. *Mathematics of Operations Research*, 41(4):1297–1324, November 2016.
- [29] Mertikopoulos, P. and Zhou, Z. Learning in games with continuous action sets and unknown payoff functions. *Mathematical Programming*, 173(1-2):465–507, January 2019.
- [30] Mertikopoulos, P., Papadimitriou, C. H., and Piliouras, G. Cycles in adversarial regularized learning. In *SODA '18: Proceedings of the 29th annual ACM-SIAM Symposium on Discrete Algorithms*, 2018.
- [31] Mertikopoulos, P., Lecouat, B., Zenati, H., Foo, C.-S., Chandrasekhar, V., and Piliouras, G. Optimistic mirror descent in saddle-point problems: Going the extra (gradient) mile. In *ICLR '19: Proceedings of the 2019 International Conference on Learning Representations*, 2019.
- [32] Nemirovski, A. S. Prox-method with rate of convergence  $O(1/t)$  for variational inequalities with Lipschitz continuous monotone operators and smooth convex-concave saddle point problems. *SIAM Journal on Optimization*, 15(1):229–251, 2004.
- [33] Palaiopanos, G., Panageas, I., and Piliouras, G. Multiplicative weights update with constant step-size in congestion games: Convergence, limit cycles and chaos. In *NIPS '17: Proceedings of the 31st International Conference on Neural Information Processing Systems*, 2017.
- [34] Piliouras, G., Sim, R., and Skoulakis, S. Optimal no-regret learning in general games: Bounded regret with unbounded step-sizes via clairvoyant mwu. <https://arxiv.org/abs/2111.14737>, 2021.
- [35] Popov, L. D. A modification of the Arrow–Hurwicz method for search of saddle points. *Mathematical Notes of the Academy of Sciences of the USSR*, 28(5):845–848, 1980.
- [36] Rakhlin, A. and Sridharan, K. Online learning with predictable sequences. In *COLT '13: Proceedings of the 26th Annual Conference on Learning Theory*, 2013.
- [37] Rakhlin, A. and Sridharan, K. Optimization, learning, and games with predictable sequences. In *NIPS '13: Proceedings of the 27th International Conference on Neural Information Processing Systems*, 2013.
- [38] Ritzberger, K. and Weibull, J. W. Evolutionary selection in normal-form games. *Econometrica*, 63(6):1371–99, November 1995.
- [39] Rockafellar, R. T. and Wets, R. J. B. *Variational Analysis*, volume 317 of *A Series of Comprehensive Studies in Mathematics*. Springer-Verlag, Berlin, 1998.
- [40] Sandholm, W. H. *Population Games and Evolutionary Dynamics*. MIT Press, Cambridge, MA, 2010.
- [41] Shalev-Shwartz, S. Online learning and online convex optimization. *Foundations and Trends in Machine Learning*, 4(2):107–194, 2011.
- [42] Shalev-Shwartz, S. and Singer, Y. Convex repeated games and Fenchel duality. In *NIPS' 06: Proceedings of the 19th Annual Conference on Neural Information Processing Systems*, pp. 1265–1272. MIT Press, 2006.
- [43] Syrgkanis, V., Agarwal, A., Luo, H., and Schapire, R. E. Fast convergence of regularized learning in games. In *NIPS '15: Proceedings of the 29th International Conference on Neural Information Processing Systems*, pp. 2989–2997, 2015.
- [44] van Damme, E. *Stability and perfection of Nash equilibria*. Springer-Verlag, Berlin, 1987.
- [45] Viossat, Y. and Zapechelnyuk, A. No-regret dynamics and fictitious play. *Journal of Economic Theory*, 148(2):825–842, March 2013.
- [46] Vovk, V. G. Aggregating strategies. In *COLT '90: Proceedings of the 3rd Workshop on Computational Learning Theory*, pp. 371–383, 1990.
- [47] Weibull, J. W. *Evolutionary Game Theory*. MIT Press, Cambridge, MA, 1995.
- [48] Zimmert, J. and Seldin, Y. An optimal algorithm for stochastic and adversarial bandits. In *AISTATS '19: Proceedings of the 22nd International Conference on Artificial Intelligence and Statistics*, 2019.
- [49] Zimmert, J. and Seldin, Y. Tsallis-INF: An optimal algorithm for stochastic and adversarial bandits. *Journal of Machine Learning Research*, 22(28):1–49, 2021.

## 499 A Auxiliary results

500 In this appendix we collect some basic properties of the regularized choice maps and some results  
501 from probability theory that will be useful in the sequel.

502 **A.1. Regularized choice maps and their properties.** Throughout this appendix, we will suppress  
503 the player index  $i \in \mathcal{N}$ , and we will follow standard conventions in convex analysis [39] that treat  $h$   
504 as an extended-real-valued function  $h: \mathcal{V} \rightarrow \mathbb{R} \cup \{\infty\}$  with  $h(x) = \infty$  for all  $x \in \mathcal{V} \setminus \mathcal{X}$ . With this in  
505 mind, the subdifferential of a  $h$  at  $x \in \mathcal{X}$  is defined as

$$\partial h(x) := \{y \in \mathcal{Y} : h(x') \geq h(x) + \langle y, x' - x \rangle \text{ for all } x' \in \mathcal{X}\}, \quad (\text{A.1})$$

506 where  $\mathcal{Y}$  denotes here the algebraic dual  $\mathcal{V}^*$  of  $\mathcal{V}$ . Accordingly, the *domain of subdifferentiability* of  
507  $h$  is  $\text{dom } \partial h := \{x \in \text{dom } h : \partial h \neq \emptyset\}$ , and the convex conjugate of  $h$  is defined as

$$h^*(y) = \max_{x \in \mathcal{X}} \{\langle y, x \rangle - h(x)\} \quad (\text{A.2})$$

508 for all  $y \in \mathcal{Y}$ . We then have the following basic results.

509 **Lemma A.1.** *Let  $h$  be a regularizer on  $\mathcal{X}$ , and let  $Q: \mathcal{Y} \rightarrow \mathcal{X}$  be the induced choice map. Then:*

- 510 1.  $Q$  is single-valued, and, for all  $x \in \mathcal{X}$ ,  $y \in \mathcal{Y}$ , we have  $x = Q(y) \iff y \in \partial h(x)$ .
- 511 2. For all  $x \in \text{ri } \mathcal{X}$ , we have  $\partial h(x) = \{(\theta'(x_\alpha) + \mu)_{\alpha \in \mathcal{A}} : \mu \in \mathbb{R}\}$ .
- 512 3. For all  $y \in \mathcal{Y}$ , we have  $Q(y) = \nabla h^*(y)$ .
- 513 4.  $Q$  is  $(1/K)$ -Lipschitz continuous with  $K := \inf_{(0,1]} \theta''(z)$ . In particular, as a special case, the logit  
514 choice map  $\Lambda$  is 1-Lipschitz continuous in the  $(L^1, L^\infty)$  pair of norms on  $\mathcal{Y}$  and  $\mathcal{X}$  respectively.
- 515 5. If  $y_\alpha - y_{\alpha'} \rightarrow -\infty$  for some  $\alpha' \neq \alpha$ , then  $Q_\alpha(y) \rightarrow 0$ .

516 *Remark.* Some of the properties presented in Lemma A.1 are well known in the literature on  
517 regularized learning methods (see e.g., [28] and references therein), but we provide a proof of the  
518 entire lemma for completeness.  $\blacklozenge$

519 *Proof of Lemma A.1.* For the first property of  $Q$ , note that the maximum in (4) is attained for all  
520  $y \in \mathcal{Y}$  because  $h$  is lower-semicontinuous (l.s.c.) and strongly convex. Furthermore,  $x$  solves (4) if  
521 and only if  $y - \partial h(x) \ni 0$ , i.e., if and only if  $y \in \partial h(x)$ .

522 For our second claim, if  $x \in \text{ri}(\mathcal{X})$ , the first-order stationarity conditions for the convex problem (4)  
523 that defines  $Q$  become

$$y_\alpha - \theta'(x_\alpha) = \mu \quad \text{for all } \alpha \in \mathcal{A}, \quad (\text{A.3})$$

524 because the inequality constraints  $x_\alpha \geq 0$  are all inactive (recall that  $x \in \text{ri}(\mathcal{X})$  by assumption). Now,  
525 by the first part of the theorem we have  $x = Q(y)$  if and only if  $y \in \partial h(x)$ , so we conclude that  
526  $\partial h(x) = \{(\theta'(x_\alpha) + \mu)_{\alpha \in \mathcal{A}} : \mu \in \mathbb{R}\}$ , as claimed.

527 For the fourth item, the expression  $Q = \nabla h^*$  is an immediate consequence of Danskin's theorem,  
528 while the Lipschitz continuity of  $Q$  follows from standard results, see e.g., [39, Theorem 12.60(b)].

529 For our last claim, let  $y_t$  be a sequence in  $\mathcal{Y}$  such that  $y_{\alpha,t} - y_{\alpha',t} \rightarrow -\infty$  and let  $x_t = Q(y_t)$ . Then,  
530 by descending to a subsequence if necessary, assume there exists some  $\varepsilon > 0$  such that  $x_{\alpha,t} \geq \varepsilon > 0$   
531 for all  $t$ . Then, by the defining relation  $Q(y) = \arg \max \{\langle y, x \rangle - h(x)\}$  of  $Q$ , we have:

$$\langle y_t, x_t \rangle - h(x_t) \geq \langle y_t, x' \rangle - h(x') \quad (\text{A.4})$$

532 for all  $x' \in \mathcal{X}$ . Therefore, taking  $x'_t = x_t + \varepsilon(e_{\alpha'} - e_\alpha)$ , we readily obtain

$$\varepsilon(y_{\alpha,t} - y_{\alpha',t}) \geq h(x_t) - h(x'_t) \geq \min h - \max h \quad (\text{A.5})$$

533 which contradicts our original assumption that  $y_{\alpha,t} - y_{\alpha',t} \rightarrow -\infty$ . With  $\mathcal{X}$  compact, the above shows  
534 that  $x_\alpha^* = 0$  for any limit point  $x^*$  of  $x_t$ , i.e.  $Q_\alpha(y_t) \rightarrow 0$ .  $\blacksquare$

535 The second collection of results concerns the *Fenchel coupling*, an energy function that was first  
536 introduced in [28, 29] and is defined as follows:

$$F(p, y) = h(p) + h^*(y) - \langle y, p \rangle \quad \text{for all } p \in \mathcal{X} \text{ and } y \in \mathcal{Y}. \quad (\text{A.6})$$

537 This coupling will play a major role in the proofs of Theorem 1, so we prove two of its most basic  
538 properties below.

539 **Lemma A.2.** For all  $p \in \mathcal{X}$  and all  $y, y' \in \mathcal{Y}$ , we have:

$$a) \quad F(p, y) \geq \frac{1}{2}K \|Q(y) - p\|^2. \quad (\text{A.7a})$$

$$b) \quad F(p, y') \leq F(p, y) + \langle y' - y, Q(y) - p \rangle + \frac{1}{2K} \|y' - y\|_\infty^2. \quad (\text{A.7b})$$

540 In particular, if  $h(0) = 0$ , we have

$$(K/2)\|Q(y)\|^2 \leq h^*(y) \leq -\min h + \langle y, Q(y) \rangle + (2/K)\|y\|_\infty^2 \quad \text{for all } y \in \mathcal{Y}. \quad (\text{A.8})$$

541 *Proof of Lemma A.2.* By the strong convexity of  $h$  relative to  $\|\cdot\|$  (cf. Lemma A.1), we have

$$\begin{aligned} h(x) + t\langle y, p - x \rangle &\leq h(x + t(p - x)) \\ &\leq th(p) + (1 - t)h(x) - \frac{1}{2}Kt(1 - t)\|x - p\|^2, \end{aligned} \quad (\text{A.9})$$

542 leading to the bound

$$\frac{1}{2}K(1 - t)\|x - p\|^2 \leq h(p) - h(x) - \langle y, p - x \rangle = F(p, y) \quad (\text{A.10})$$

543 for all  $t \in (0, 1]$ . The bound (A.7a) then follows by letting  $t \rightarrow 0^+$  in (A.10).

544 For our second claim, we have

$$\begin{aligned} F(p, y') &= h(p) + h^*(y') - \langle y', p \rangle \\ &\leq h(p) + h^*(y) + \langle y' - y, \nabla h^*(y) \rangle + \frac{1}{2K} \|y' - y\|_\infty^2 - \langle y', p \rangle \\ &= F(p, y) + \langle y' - y, Q(y) - p \rangle + \frac{1}{2K} \|y' - y\|_\infty^2, \end{aligned} \quad (\text{A.11})$$

545 where the inequality in the second line follows from the fact that  $h^*$  is  $(1/K)$ -strongly smooth [39, Theorem 12.60(e)]. ■

547 **A.2. Basic results from probability theory.** We conclude this appendix with some useful results  
548 from probability theory that we will use freely throughout the sequel. For a complete treatment, we  
549 refer the reader to Hall & Heyde [21].

550 **Lemma A.3** (Azuma-Hoeffding inequality). Let  $M_t \in \mathbb{R}$ ,  $t = 1, 2, \dots$ , be a martingale with  
551  $\|M_t - M_{t-1}\|_\infty \leq \sigma_t$  (a.s.). Then, for all  $\eta > 0$ , we have

$$\mathbb{P}\left(|M_t| \leq \left(2 \log(2t^2/\eta) \sum_{s=1}^t \sigma_s^2\right)^{1/2} \text{ for all } t\right) \geq 1 - \eta. \quad (\text{A.12})$$

552 **Lemma A.4** (Kolmogorov's inequality). Let  $Z_t \in \mathbb{R}$ ,  $t = 1, 2, \dots$ , be a martingale difference  
553 sequence that is bounded in  $L^2$ . Then:

$$\mathbb{P}\left(\max_{s \leq t} \sum_{\ell=1}^s Z_\ell \geq \varepsilon\right) \leq \frac{1}{\varepsilon^2} \mathbb{E}\left[\left(\sum_{s=1}^t Z_s\right)^2\right] \quad \text{for all } \varepsilon > 0. \quad (\text{A.13})$$

554 **Lemma A.5** (Doob's maximal inequality). Let  $Z_t \in \mathbb{R}$ ,  $t = 1, 2, \dots$ , be a martingale difference  
555 sequence that is bounded in  $L^p$  for some  $p \geq 1$ . Then

$$\mathbb{P}\left(\max_{s \leq t} |Z_s| > \varepsilon\right) \leq \frac{1}{\varepsilon^p} \mathbb{E}[|Z_t|^p] \quad \text{for all } \varepsilon > 0. \quad (\text{A.14})$$

556 **Lemma A.6** (Burkholder–Davis–Gundy inequality). Let  $Z_t$ ,  $t = 1, 2, \dots$ , be a martingale difference  
557 sequence in  $\mathbb{R}^n$ . Then, for all  $p > 1$ , there exist constants  $c_p, C_p$  that depend only on  $p$  and are such  
558 that

$$c_p \mathbb{E}\left[\sum_{s=1}^t \|Z_s\|_2^2\right]^{p/2} \leq \mathbb{E}\left[\max_{s \leq t} \left\|\sum_{\ell=1}^s Z_\ell\right\|_2^p\right] \leq C_p \mathbb{E}\left[\sum_{s=1}^t \|Z_s\|_2^2\right]^{p/2}. \quad (\text{A.15})$$

559 **Lemma A.7** (Robbins–Siegmund). Let  $\mathcal{F}_t$ ,  $t = 1, 2, \dots$ , be a filtration on a complete probability  
560 space  $(\Omega, \mathcal{F}, \mathbb{P})$ , and suppose that the sequences  $X_t$ ,  $L_t$  and  $K_t$   $\mathcal{F}_t$ -measurable, nonnegative, and  
561 such that

$$\mathbb{E}[X_{t+1} | \mathcal{F}_t] \leq X_t(1 + L_t) + K_t \quad \text{with probability 1.} \quad (\text{A.16})$$

562 Then,  $X_t$  converges to some random variable  $X_\infty$  with probability 1 on the event  
563  $\{\sum_{t=1}^\infty L_t < \infty \text{ and } \sum_{t=1}^\infty K_t < \infty\}$ .

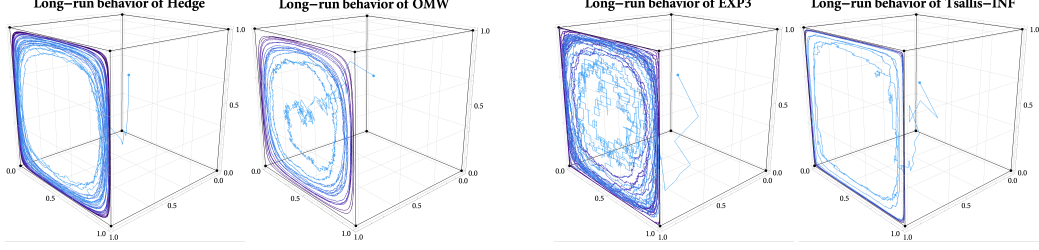

**Figure 2:** The long-run behavior of Algorithms 1–3 in a  $2 \times 2 \times 2$  game. Algorithms 1 and 2 were run with a logit choice map as per (HEDGE); Algorithm 3 was run with both variants, EXP3 and TSALLIS-INF. All algorithms were run for  $5 \times 10^5$  iterations with  $\gamma_t = 1/t^{0.4}$  and  $\delta_t = 0.1/t^{0.15}$ ; color indicates time, with darker hues indicating later iterations. The face to the left is closed under better replies, so  $X_t$  converges quickly to said face (as per Theorems 2 and 3).

## B Specific algorithms and their properties

**B.1. Known algorithms as special cases of (RL).** To complement our analysis in the main part of our paper, we detail below how Algorithms 1–3 can be recast in the general framework of (RL). To lighten notation, we will assume that  $b_t$ ,  $U_t$  and  $\hat{v}_t$  are respectively bounded as

$$\|b_t\|_\infty \leq B_t \quad \|U_t\|_\infty \leq \sigma_t \quad \text{and} \quad \|\hat{v}_t\|_\infty \leq M_t \quad (\text{B.1})$$

and we will set

$$G := \max_{i \in \mathcal{N}} \max_{\alpha \in \mathcal{A}} |v_i(\alpha)| \quad (\text{B.2})$$

so we can take  $M_t = G + B_t + \sigma_t$  in (B.1). We will also make free use of the fact that  $v$  is Lipschitz continuous on  $\mathcal{X}$ , and we will write  $L$  for its Lipschitz modulus in the  $(L^1, L^\infty)$  pair of norms on  $\mathcal{X}$  and  $\mathcal{Y}$  respectively, viz.

$$\|v(x') - v(x)\|_\infty \leq L \|x' - x\|_1 \quad \text{for all } x, x' \in \mathcal{X}. \quad (\text{B.3})$$

We now proceed to establish the required bounds for Algorithms 1–3:

**Algorithm 1.** Since  $\hat{v}_t = v(X_t)$ , we readily get  $b_t = U_t = 0$  by definition, so Algorithm 1 fits the scheme (RL) for free with  $\ell_b = \infty$ ,  $\ell_\sigma = 0$ . ♦

**Algorithm 2.** For the case of (Opt-FTRL), we have  $\hat{v}_t = 2v(X_t) - v(X_{t-1})$  so  $b_t = v(X_t) - v(X_{t-1})$ , which is  $\mathcal{F}_t$ -measurable. We thus get

$$\begin{aligned} \|b_t\|_\infty &= \|\mathbb{E}[\hat{v}_t | \mathcal{F}_t] - v(X_t)\|_\infty \leq \mathbb{E}[\|v(X_t) - v(X_{t-1})\|_\infty | \mathcal{F}_t] \\ &\leq L \mathbb{E}[\|X_t - X_{t-1}\| | \mathcal{F}_t] && \# \text{ by (B.3)} \\ &= L \mathbb{E}[\|Q(Y_t) - Q(Y_{t-1})\|_\infty | \mathcal{F}_t] && \# \text{ by (Opt-FTRL)} \\ &\leq (L/K) \mathbb{E}[\|Y_t - Y_{t-1}\|_\infty | \mathcal{F}_t] && \# \text{ by Lemma A.1} \\ &\leq \gamma_t (L/K) \mathbb{E}[2v(X_t) - v(X_{t-1}) | \mathcal{F}_t] && \# \text{ by (Opt-FTRL)} \\ &\leq 3LG/K \cdot \gamma_t && \# \text{ by (B.2)} \\ &= \mathcal{O}(\gamma_t) = \mathcal{O}(1/t^{\ell_\gamma}) && (\text{B.4}) \end{aligned}$$

Moreover, given that  $\hat{v}$  is  $\mathcal{F}_t$ -measurable, we readily get  $U_t = 0$ . ♦

**Algorithm 3.** Since  $\hat{\alpha}_t$  is sampled according to  $\hat{X}_t = (1 - \delta_t)X_{i,t} + \delta_t \text{unif}_{\mathcal{A}_i}$  (cf. Eq. (7) in Section 3), we readily obtain  $\mathbb{E}[\hat{v}_{i,t} | \mathcal{F}_t] = v_i(\hat{X}_t)$ , and hence, by (B.3), we get

$$B_t = \mathcal{O}(\|\hat{X}_t - X_t\|) = \mathcal{O}(\delta_t) = \mathcal{O}(1/t^{\ell_\delta}). \quad (\text{B.5})$$

Moreover, since  $\hat{X}_{i\alpha_i,t} \geq \delta_t/A_i$ , it follows that  $\|\hat{v}_t\|_\infty = \mathcal{O}(1/\delta_t) = \mathcal{O}(t^{\ell_\delta})$ . ♦

For comparison purposes, we illustrate the algorithms' behavior in a simple  $2 \times 2 \times 2$  game in Fig. 2.

|             | Representative | Regularizer ( $\theta$ ) | Feedback  | Bias ( $B_t$ )                   | Variance ( $\sigma_t$ )        |
|-------------|----------------|--------------------------|-----------|----------------------------------|--------------------------------|
| Algorithm 1 | HEDGE          | $z \log z$               | full info | 0                                | 0                              |
| Algorithm 2 | OMW            | $z \log z$               | full info | $\mathcal{O}(1/t^{\ell_\gamma})$ | 0                              |
| Algorithm 3 | EXP3           | $z \log z$               | payoff    | $\mathcal{O}(1/t^{\ell_\delta})$ | $\mathcal{O}(t^{\ell_\delta})$ |
| Algorithm 3 | TSALLIS-INF    | $-4\sqrt{z}$             | payoff    | $\mathcal{O}(1/t^{\ell_\delta})$ | $\mathcal{O}(t^{\ell_\delta})$ |
| Algorithm 4 | MP             | general                  | full info | $\mathcal{O}(1/t^{\ell_\gamma})$ | 0                              |
| Algorithm 5 | CMW            | $z \log z$               | full info | $\mathcal{O}(1/t^{\ell_\delta})$ | 0                              |

**Table 1:** A range of algorithms adhering to the general template (RL) and their bias and variance characteristics when run with a step-size sequence of the form  $\gamma_t = \gamma/t^{\ell_\gamma}$ ,  $\ell_\gamma \in (0, 1]$ , and, where applicable, a sampling parameter  $\delta_t = \delta/t^{\ell_\delta}$ .

**B.2. Further algorithms and illustrations.** To demonstrate the breadth of (RL) as an algorithmic template, we provide below some more examples of algorithms from the game-theoretic literature that can be recast as special cases thereof (see also Table 1 for a recap).

**Algorithm 4** (Mirror-prox). A progenitor of (Opt-FTRL) is the so-called *mirror-prox* (MP) algorithm [24, 32], which updates as:

$$\begin{aligned} \tilde{Y}_t &= Y_t + \gamma_t v(X_t) & Y_{t+1} &= Y_t + \gamma_t v(\tilde{X}_t) \\ \tilde{X}_t &= Q(\tilde{Y}_t) & X_{t+1} &= Q(Y_{t+1}). \end{aligned} \quad (\text{MP})$$

The main difference between (MP) and (Opt-FTRL) is that the former utilizes two surrogate gain vectors per iteration – meaning in particular that the interim, leading state  $\tilde{X}_t$  is generated with payoff information from  $X_t$ , not  $\tilde{X}_{t-1}$ . This method has been used extensively in the literature for solving variational inequalities and two-player, zero-sum games, cf. Juditsky et al. [24] and references therein.

A calculation similar to that for (Opt-FTRL) shows that Algorithm 4 has  $B_t = \mathcal{O}(1/t^{\ell_\gamma})$  and  $\sigma_t = 0$  because the algorithm has no further randomization. ♦

**Algorithm 5** (Clairvoyant multiplicative weights). A recent variant of the HEDGE algorithm is the so-called *clairvoyant multiplicative weights* (CMW) algorithm [34]

$$Y_{i,t+1} = Y_{i,t} + \gamma_t v_i(X_{t+1}) \quad X_{i,t+1} = \Lambda_i(Y_{i,t+1}). \quad (\text{CMW})$$

The main difference between (CMW) and (HEDGE) is that the proxy payoff vector  $\hat{v}_t$  in (CMW) is based on the *future* state  $X_{t+1}$  and *not* the current state  $X_t$ . To perform this “clairvoyant” update, the players of the game must coordinate to solve an implicit fixed point problem, so (CMW) is only meaningful when one has access to the payoff function  $v(\cdot)$ . In this regard, (CMW) can be seen as a Bregman proximal point method in the general spirit of Bauschke et al. [7].

To cast (CMW) as an instance of the generalized template (RL), simply note that the sequence of input signals is given by  $\hat{v}_t = v(X_{t+1})$ , so  $U_t = 0$  and  $b_t = v(X_{t+1}) - v(X_t) = \mathcal{O}(\gamma_t) = \mathcal{O}(1/t^{\ell_\gamma})$ . ♦

## C Proof of Theorem 1

Our main goal in this appendix will be to prove Theorem 1 on the resilience properties of (RL). For convenience, we restate below the relevant result for ease of reference:

**Theorem 1.** *Let  $X_t$ ,  $t = 1, 2, \dots$ , be the sequence of play generated by (RL) with step-size/gain parameters  $\ell_\gamma > 2\ell_\sigma$  and  $\ell_b > 0$ . Then, with probability 1, the limit set  $\mathcal{L}(X)$  of  $X_t$  is resilient.*

*Proof.* Our proof that  $\mathcal{L}(X)$  is resilient hinges on an energy-based technique that we will employ repeatedly in other parts of our analysis. To begin, introduce a player-strategy deviation pair  $(i, z_i)$ , and say that a set is resilient to  $(i, z_i)$  if there exists an element of the set, say  $x^*$ , which counters said deviation, i.e., such that  $u_i(x^*) \geq u_i(z_i; x_{-i}^*)$ . In this specific case, our proof proceeds by contradiction, namely by assuming that, with positive probability,  $\mathcal{L}(X)$  is *not* resilient to  $(i, z_i)$ . The main steps of our proof unfold as follows:

613 **Step 1.** Assume that  $\mathcal{L}(X)$  is not resilient to  $(i, z_i)$  with positive probability. Then there exists  
 614  $c, \epsilon, t_0 > 0$  such that

$$\mathbb{P}(u_i(z_i; X_{t,-i}) \geq u_i(X_t) + c \text{ for all } t \geq t_0) \geq \epsilon. \quad (\text{C.1})$$

615 *Proof of Step 1.* The function  $f : x \in \mathcal{X} \mapsto u_i(z_i; x_{-i}) - u_i(x)$  is continuous and  $\mathcal{X}$  is compact, so  
 616 there is a definite function  $\eta \equiv \eta(\delta)$  such that if  $\|x - x'\| \leq \eta(\delta)$ , then  $|f(x) - f(x')| \leq \delta$ . Now, by  
 617 assumption,  $\{\forall x^* \in \mathcal{L}(X), u_i(z_i; x_{-i}^*) > u_i(x^*)\}$  is of positive probability. We thus get

$$\begin{aligned} 0 &< \mathbb{P}\{\forall x^* \in \mathcal{L}(X), u_i(z_i; x_{-i}^*) > u_i(x^*)\} \\ &= \mathbb{P}\left\{\inf_{x^* \in \mathcal{L}(X)} (u_i(z_i; x_{-i}^*) - u_i(x^*)) > 0\right\} \end{aligned} \quad (\text{C.2a})$$

$$= \mathbb{P}\left(\bigcup_{m>0} \left\{\inf_{x^* \in \mathcal{L}(X)} (u_i(z_i; x_{-i}^*) - u_i(x^*)) > 2^{-m}\right\}\right) \quad (\text{C.2b})$$

$$\leq \frac{1}{2} \mathbb{P}\{\forall x^* \in \mathcal{L}(X), u_i(z_i; x_{-i}^*) - u_i(x^*) > 2c\} \quad (\text{C.2c})$$

618 for some  $c > 0$  in (C.2c), and where (C.2a) is because  $\mathcal{L}(X)$  is closed – hence compact – almost  
 619 surely. Therefore, by definition of  $\eta(\cdot)$ ,

$$0 < \mathbb{P}\{\forall x^* \in \mathcal{X}, \text{dist}(x^*, \mathcal{L}(X)) \leq \eta(c) \Rightarrow u_i(z_i; x_{-i}^*) - u_i(x^*) > c\} = 2\epsilon \quad (\text{C.2d})$$

620 Now, let  $t_0$  such that  $\mathbb{P}\{\forall t \geq t_0, \text{dist}(X_t, \mathcal{L}(X)) \leq \eta(c)\} > 1 - \frac{\epsilon}{2}$ . Then by construction, we get

$$\mathbb{P}\{\forall t \geq t_0, u_i(z_i; X_{t,-i}) > u_i(X_t) + c\} > \epsilon. \quad (\text{C.3})$$

621 and our proof is complete. ■

622 Intuitively, the existence of an action that consistently outperforms  $X_t$  runs contrary to the behavior  
 623 that one would expect from any regularized learning algorithm. We will proceed to make this intuition  
 624 precise below by means of an energy argument. To that end, consider the Fenchel coupling

$$F_t = h_i(z_i) + h_i^*(Y_{i,t}) - \langle Y_{i,t}, z_i \rangle \quad (\text{C.4})$$

625 Then, by Lemma A.2 in Appendix A, we readily get that

$$F_{t+1} \leq F_t - \gamma_t \langle \hat{v}_{i,t}, z_i - X_{i,t} \rangle + \frac{\gamma_t^2}{2\kappa_h} \|\hat{v}_{i,t}\|_\infty^2. \quad (\text{C.5})$$

626 where, in obvious notation, we are identifying  $z_i \in \mathcal{A}_i$  with the corresponding vertex  $e_{z_i}$  of  $\mathcal{X}_i =$   
 627  $\Delta(\mathcal{A}_i)$ . To proceed, the main idea will be to relate  $\gamma_t \langle \hat{v}_{i,t}, z_i - X_{i,t} \rangle$  to its “perfect” counterpart  
 628  $\gamma_t \langle v_i(X_t), z_i - X_{i,t} \rangle$ . We formalize this below.

629 **Step 2.** If  $\mathcal{L}(X)$  is not resilient to  $(i, z_i)$ , there exists  $t_1 \geq t_0$  such that, with probability  $\epsilon'/2 > 0$ , and  
 630 for all  $t \geq t_1$ , we have

$$F_t \leq F_{t_0} - \frac{c}{2} \sum_{s=t_0}^t \gamma_s. \quad (\text{C.6})$$

631 *Proof of Step 2.* With probability  $\epsilon'$  and for all  $t \geq t_0$ , we have

$$\gamma_t \langle \hat{v}_{i,t}, z_i - X_{i,t} \rangle = \gamma_t \langle v_i(X_t), z_i - X_{i,t} \rangle + \gamma_t \langle U_{i,t}, z_i - X_{i,t} \rangle + \gamma_t \langle b_{i,t}, z_i - X_{i,t} \rangle \quad (\text{C.7})$$

$$\geq [c + \langle U_{i,t}, z_i - X_{i,t} \rangle + \langle b_{i,t}, z_i - X_{i,t} \rangle] \gamma_t. \quad (\text{C.8})$$

632 The combination of Eqs. (C.5) and (C.8) then provides the following upper bound of  $F_{t+1}$ :

$$F_{t+1} \leq F_t - c\gamma_t + \gamma_t \langle U_{i,t}, z_i - X_{i,t} \rangle + \gamma_t \langle b_{i,t}, z_i - X_{i,t} \rangle + \frac{\gamma_t^2}{2\kappa_h} \|\hat{v}_{i,t}\|_\infty^2 \quad (\text{C.9})$$

$$\leq F_{t_0} - c \sum_{s=t_0}^t \gamma_s + \underbrace{\sum_{s=t_0}^t \gamma_s \langle U_{s,i}, z_i - X_{s,i} \rangle}_{E_{U,t}} + \underbrace{\sum_{s=t_0}^t \gamma_s \langle b_{s,i}, z_i - X_{s,i} \rangle}_{E_{b,t}} + \sum_{s=t_0}^t \frac{\|\hat{v}_{s,i}\|_\infty^2}{2\kappa_h} \gamma_s^2. \quad (\text{C.10})$$

633 We are thus left to show is that  $c \sum_{s=t_0}^t \gamma_s$  is the dominant term above. To do so, we proceed to  
 634 examine each term individually:

635 • *Second-order term:* We first deal with the second-order term  $\sum_{s=t_0}^t \frac{\|\hat{v}_{s,i}\|_\infty^2}{2\kappa_h} \gamma_s^2$ . By expanding the  
 636  $\|\hat{v}_{s,i}\|_\infty^2$ , we readily get

$$\frac{\sum_{s=t_0}^t \|\hat{v}_{s,i}\|_\infty^2 \gamma_s^2}{\tau_t} = \mathcal{O}\left(\frac{\sum_{s=1}^t \gamma_s^2 (1 + B_s^2 + \sigma_s^2)}{\sum_{s=1}^t \gamma_s}\right). \quad (\text{C.11})$$

637 However, by our assumptions on the parameters of (RL), we readily get

$$\lim_{t \rightarrow \infty} \frac{\gamma_t^2 (1 + B_t^2 + \sigma_t^2)}{\gamma_t} = 0 \quad (\text{C.12})$$

638 so we conclude that

$$\lim_{t \rightarrow \infty} \frac{\sum_{s=1}^t \gamma_s^2 (1 + B_s^2 + \sigma_s^2)}{\sum_{s=1}^t \gamma_s} \quad (\text{C.13})$$

639 by the Stolz-Cesàro theorem.

640 • *Bias term:* By far the most immediate, the bias term  $E_{b,t}$  is bounded as

$$E_{b,t} \leq 2 \sum_{s=t_0}^t \|b_{s,i}\|_\infty \gamma_s \leq 2 \sum_{s=t_0}^t B_s \gamma_s = o\left(\sum_{s=t_0}^t \gamma_s\right) \quad \text{as } t \rightarrow \infty. \quad (\text{C.14})$$

641 • *Noise term:* Finally, the noise term  $E_{U,t}$  is bounded by means of the Azuma-Hoeffding inequality,  
 642 cf. Lemma A.3 in Appendix A. Specifically, with probability at least  $1 - \varepsilon'/2$ , we have

$$\begin{aligned} E_{U,t} &:= \sum_{s=t_0}^t \gamma_s \langle U_{s,i}, z_i - X_{s,i} \rangle \\ &\leq 2 \left( \sum_{s=t_0}^t \|U_{s,i}\|_\infty^2 \gamma_s^2 \right)^{1/2} \sqrt{2 \log\left(\frac{4t^2}{\varepsilon'}\right)} \\ &\leq 2 \left( \sum_{s=t_0}^t \sigma_s^2 \gamma_s^2 \right)^{1/2} \sqrt{2 \log\left(\frac{4t^2}{\varepsilon'}\right)}. \end{aligned} \quad (\text{C.15})$$

643 for all  $t \geq t_0$ . To proceed, note that a second application of the Stolz-Cesàro theorem yields  
 644  $\sum_{s=t_0}^t \sigma_s^2 \gamma_s^2 = o(\sum_{s=t_0}^t \gamma_s)$  and, moreover, note that  $\log(4t^2/\varepsilon') = \mathcal{O}(\sum_{s=t_0}^t \gamma_s)$ . Taking square  
 645 roots and multiplying then yields that

$$E_{U,t} = o\left(\sum_{s=t_0}^t \gamma_s\right) \quad (\text{C.16})$$

646 with probability at least  $1 - \varepsilon'/2$ .

647 We are now in a position to establish the bound Eq. (C.6). Indeed, putting Eqs. (C.13), (C.14)  
 648 and (C.16) together, we readily infer that there exists  $t_1 \geq t_0$  such that, with probability at least  
 649  $1 - \varepsilon'/2$ , we have

$$\sum_{s=t_0}^t \gamma_s \langle U_{s,i}, z_i - X_{s,i} \rangle + \sum_{s=t_0}^t \gamma_s \langle b_{s,i}, z_i - X_{s,i} \rangle + \sum_{s=t_0}^t \frac{\|\hat{v}_{s,i}\|_\infty^2}{2\kappa_h} \gamma_s^2 \leq \frac{c}{2} \sum_{s=t_0}^t \gamma_s \quad (\text{C.17})$$

650 for all  $t \geq t_1$ . This proves Eq. (C.6) and concludes our proof. ■

651 Summarizing the above, we have shown that, with probability at least  $1 - \varepsilon'/2$ , we have

$$F_{t+1} \leq F_{t_0} - \frac{c}{2} \sum_{s=t_0}^t \gamma_s \rightarrow -\infty \quad \text{as } t \rightarrow \infty. \quad (\text{C.18})$$

652 Since  $F$  is nonnegative (by Lemma A.2), we have established that the event where  $\mathcal{L}(X)$  is not  
 653 resilient to  $(i, z_i)$  is an event of probability zero. However, since there are uncountably many strategic  
 654 deviations, the proof is not yet complete; the last step involves an approximation by deviations with  
 655 *rational* entries.

656 **Step 3.**  $\mathcal{L}(X)$  is almost-surely resilient.

657 *Proof of Step 3.* The key point of the proof is the observation that a closed set is resilient if and  
 658 only if it is *rationally* resilient, i.e., it nullifies all *rational* deviations  $z_i \in \mathcal{X}_i \cap \mathbb{Q}^{\mathcal{A}_i}$  (which are  
 659 countably many). Indeed, if  $\mathcal{L}(X)$  is not resilient with positive probability, then, likewise,  $\mathcal{L}(X)$  will  
 660 not be rationally resilient with positive probability either. Because there are countably many rational  
 661 deviations, there must be a rational strategic deviation  $(i, z_i)$  (with  $z_i \in \mathcal{X}_i \cap \mathbb{Q}^{\mathcal{A}_i}$ ) to which  $\mathcal{L}(X)$  is  
 662 not resilient. This comes in contradiction with the conclusions of Step 2. ■

663 This concludes the last required step, so the proof of Theorem 1 is now complete. ■

## 664 D Proof of Theorems 2 and 3

665 In this last appendix, our goal is to prove our characterization of club sets, namely:

666 **Theorem 2.** Fix some set  $\mathcal{S} \in \mathcal{P}(\mathcal{X})$  and suppose that (RL) is run with a steep regularizer and  
 667 step-size/gain parameters  $\ell_\gamma \in [0, 1]$ ,  $\ell_b > 0$ , and  $\ell_\sigma < 1/2$ . Then:

- 668 1.  $\mathcal{S}$  is stochastically asymptotically stable under (RL) if and only if it is a club set.
- 669 2.  $\mathcal{S}$  is irreducibly stable under (RL) if and only if it is an  $m$ -club set.

670 **Theorem 3.** Let  $\mathcal{S} \in \mathcal{P}(\mathcal{X})$  be a club set, and let  $X_t$ ,  $t = 1, 2, \dots$ , be the sequence of play generated  
 671 by (RL) with parameters  $\ell_\gamma \in [0, 1]$ ,  $\ell_b > 0$ , and  $\ell_\sigma < 1/2$ . Then, for all  $\epsilon > 0$ , there exists an (open,  
 672 unbounded) initialization domain  $\mathcal{D} \subseteq \mathcal{Y}$  such that, with probability at least  $1 - \epsilon$ , we have

$$\text{dist}(X_t, \mathcal{S}) \leq C\varphi\left(c_1 - c_2 \sum_{s=1}^t \gamma_s\right) \quad \text{whenever } Y_1 \in \mathcal{D} \quad (11)$$

673 where  $C, c_1, c_2$  are constants ( $C, c_2 > 0$ ), and the rate function  $\varphi$  is given by  $\varphi(z) = (\theta')^{-1}(z)$  if  
 674  $z > \lim_{z \rightarrow 0^+} \theta'(z)$ , and  $\varphi(z) = 0$  otherwise.

675 Our proof strategy will be to construct a sheaf of “linearized” energy functions which, when bundled  
 676 together, yield a suitable Lyapunov-like function for  $\mathcal{S}$ . To do so, let  $\mathcal{C} = \prod_i \mathcal{C}_i$  denote the support of  
 677  $\mathcal{S}$  (cf. the definition of club sets), and let

$$\mathcal{Z}_i = \{e_{i\alpha'_i} - e_{i\alpha_i} : \alpha_i \in \mathcal{C}_i, \alpha'_i \in \mathcal{A}_i \setminus \mathcal{C}_i\} \quad (D.1)$$

678 and

$$\mathcal{Z} = \bigcup_{i \in \mathcal{N}} \mathcal{Z}_i \quad (D.2)$$

679 denote the set of all pure strategic deviations from  $\mathcal{S}$ . Then, our ensemble of candidate energy  
 680 functions will be given by

$$E_z(y) = \langle y, z \rangle \quad \text{for } z \in \mathcal{Z}, y \in \mathcal{V}^*. \quad (D.3)$$

681 The motivation for this definition is given by the following lemma.

682 **Lemma D.1.** Suppose that the sequence  $y_t \in \mathcal{V}^*$ ,  $t = 1, 2, \dots$ , has  $E_z(y_t) \rightarrow -\infty$  for all  $z \in \mathcal{Z}$  as  
 683  $t \rightarrow \infty$ . Then the sequence  $x_t = Q(y_t)$  converges to  $\mathcal{S}$  as  $t \rightarrow \infty$ .

684 *Proof.* Let  $z = e_{i\alpha'_i} - e_{i\alpha_i}$  for some  $i \in \mathcal{N}$ ,  $\alpha_i \in \mathcal{C}_i$ , and  $\alpha'_i \in \mathcal{A}_i \setminus \mathcal{C}_i$ . Since  $E_z(y_t) \rightarrow -\infty$  by  
 685 assumption, we get  $y_{i\alpha'_i, t} - y_{i\alpha_i, t} \rightarrow -\infty$  and hence, by Lemma A.1, we conclude that  $Q_{i\alpha'_i}(x_t) \rightarrow 0$   
 686 as  $t \rightarrow \infty$ . In turn, given that this holds for all  $i \in \mathcal{N}$  and all  $\alpha'_i \in \mathcal{A}_i \setminus \mathcal{C}_i$ , we conclude that  $x_t = Q(y_t)$   
 687 converges to  $\mathcal{S}$ . ■

688 In view of the above, we will focus on showing that  $E_z(Y_t) \rightarrow -\infty$  for all  $z \in \mathcal{Z}$ . As a first step, we  
 689 establish a basic template inequality for the evolution of  $E_z$  under (RL).

690 **Lemma D.2.** Fix some  $z \in \mathcal{Z}$  and let  $E_t := E_z(Y_t)$ . Then, for all  $t = 1, 2, \dots$ , we have

$$E_{t+1} \leq E_t + \gamma_t \langle v(X_t), z \rangle + \gamma_t \xi_t + \gamma_t \psi_t \quad (D.4)$$

691 where the error terms  $\xi_t$  and  $\psi_t$  are given by

$$\xi_t = \langle U_t, z \rangle \quad \text{and} \quad \psi_t = 2B_t. \quad (D.5)$$

692 *Proof.* Simply set  $y \leftarrow Y_{t+1}$  in  $E_z(y)$ , invoke the definition of the update  $Y_t \leftarrow Y_{t+1}$  in (RL), and note  
 693 that  $|\langle b_t, z \rangle| \leq \|z\| \|b_t\|_\infty \leq 2B_t$  by the definition of  $\mathcal{Z}$ . ■

694 The key take-away from (D.4) is that, if  $X_t$  is close to  $\mathcal{S}$  and  $\alpha_i \in \mathcal{C}_i$ ,  $\alpha'_i \in \mathcal{A}_i \setminus \mathcal{C}_i$ , we will have

$$\langle v(X_t), z \rangle = v_{i\alpha'_i}(X_t) - v_{i\alpha_i}(X_t) = u_i(\alpha'_i; X_{-i,t}) - u_i(\alpha_i; X_{-i,t}) < 0 \quad (\text{D.6})$$

695 by the continuity of  $u_i$  and the assumption that  $\mathcal{S}$  is a club set. More concretely, by the definition of  
 696 the better-reply correspondence, we have

$$\langle v(x^*), z \rangle < 0 \quad \text{for all } x^* \in \mathcal{S} \text{ and all } z \in \mathcal{Z} \quad (\text{D.7})$$

697 and hence, by continuity, there exists a neighborhood  $\mathcal{B}$  of  $\mathcal{S}$  such that

$$\langle v(x), z \rangle < 0 \quad \text{for all } x \in \mathcal{B} \text{ and all } z \in \mathcal{Z}. \quad (\text{D.8})$$

698 In other words, as long as  $X_t$  is sufficiently close to  $\mathcal{S}$ , (D.4) exhibits a consistent negative drift  
 699 pushing  $E_t$  towards  $-\infty$ .

700 To exploit this “dynamic consistency” property of  $\mathcal{S}$ , it will be convenient to introduce the family of  
 701 sets

$$\mathcal{D}(\epsilon) = \{y \in \mathcal{V}^* : \langle y, z \rangle < -\epsilon \text{ for all } z \in \mathcal{Z}\} \quad (\text{D.9})$$

702 As we show below, these sets are mapped under  $Q$  to neighborhoods of  $\mathcal{S}$ , so they are particularly  
 703 well-suited to serve as initialization domains for (RL). This is encoded in the following properties:

704 **Lemma D.3.** *Let  $x = Q(y)$  for some  $y \in \mathcal{V}^*$ . Then, for all  $\alpha_i, \alpha'_i, i \in \mathcal{N}$ , we have*

$$x_{i\alpha_i} \leq \varphi\left(\theta(1^-) + y_{i\alpha'_i} - y_{i\alpha_i}\right) \quad (\text{D.10})$$

705 with  $\varphi$  defined as per Theorem 3, i.e.,

$$\varphi(z) = \begin{cases} 0 & \text{if } z \leq \theta'(0^+), \\ (\theta')^{-1}(z) & \text{if } \theta'(0^+) < z < \theta'(1^-), \\ 1 & \text{if } z \geq \theta'(1^-). \end{cases} \quad (\text{D.11})$$

706 **Corollary D.1.** *For all  $\delta > 0$  there exists some  $\epsilon_\delta \in \mathbb{R}$  such that, for all  $\epsilon > \epsilon_\delta$  and all  $y \in \mathcal{D}_\epsilon$ , we  
 707 have*

$$Q_{i\alpha'_i}(y_i) < \delta \quad \text{for all } \alpha'_i \in \mathcal{A}_i \setminus \mathcal{C}_i \text{ and all } i \in \mathcal{N}. \quad (\text{D.12})$$

708 *Proof of Lemma D.3.* Suppressing the player index for simplicity, the first-order stationarity condi-  
 709 tions for the convex problem (4) readily give

$$y_\alpha - \theta'(x_\alpha) = \mu - \nu_\alpha, \quad (\text{D.13})$$

710 where  $\mu$  is the Lagrange multiplier for the equality constraint  $\sum_\alpha x_\alpha = 1$ , and  $\nu_\alpha$  is the complementary  
 711 slackness multiplier of the inequality constraint  $x_\alpha \geq 0$  (so  $\nu_\alpha = 0$  whenever  $x_\alpha > 0$ ). Thus, rewriting  
 712 (D.13) for some  $\alpha \in \mathcal{A}$ , we get

$$y_{\alpha'} - y_\alpha = \theta'(x_{\alpha'}) - \theta'(x_\alpha) + \nu_\alpha - \nu_{\alpha'} \quad (\text{D.14})$$

713 and hence

$$\theta'(x_{\alpha'}) = \theta'(x_\alpha) + \nu_{\alpha'} - \nu_\alpha + y_{\alpha'} - y_\alpha \leq \theta'(1^-) + \nu_{\alpha'} + y_{\alpha'} - y_\alpha, \quad (\text{D.15})$$

714 where we used the fact that  $\nu_\alpha \geq 0$ . Now, if  $\theta'(1^-) + y_{\alpha'} - y_\alpha < \theta'(0^+)$  and  $x_{\alpha'} > 0$  (so  $\nu_{\alpha'} = 0$ ), we  
 715 will have  $\theta'(x_{\alpha'}) < \theta'(0^+)$ , a contradiction. This shows that  $x_{\alpha'} = 0$  if  $\theta'(1^-) + y_{\alpha'} - y_\alpha < \theta'(0^+)$ ,  
 716 so (D.10) is satisfied in this case. Otherwise, if  $x_{\alpha'} > 0$ , we must have  $\nu_{\alpha'} = 0$  by complementary  
 717 slackness, so (D.10) follows by applying the second branch of (D.11) to (D.15). ■

718 The above provides us with a fairly good handle on the local geometric and dynamic properties of  
 719  $\mathcal{S}$ . On the flip side however, the various error terms in (D.5) may be positive, so  $E_t$  may fail to be  
 720 decreasing and  $X_t$  may drift away from  $\mathcal{S}$ . On that account, it will be convenient to introduce the  
 721 aggregate error processes

$$I_t = \sum_{s=1}^t \gamma_s \xi_s \quad \text{and} \quad \Pi_t = \sum_{s=1}^t \gamma_s \psi_s. \quad (\text{D.16})$$

722 Intuitively, the aggregates (D.16) measure the total effect of each error term in (D.4), so we will  
 723 establish a first series of results under the following general requirements:

724 1. *Subleading error growth:*

$$\lim_{t \rightarrow \infty} \mathbf{I}_t / \tau_t = 0 \quad (\text{Sub.I})$$

$$\lim_{t \rightarrow \infty} \mathbf{II}_t / \tau_t = 0 \quad (\text{Sub.II})$$

725 where  $\tau_t = \sum_{s=1}^t \gamma_s$  and both limits are to be interpreted in the almost sure sense.

726 2. *Drift dominance:*

$$\mathbb{P}(\mathbf{I}_t \leq C\tau_t^\alpha/2 \text{ for all } t) \geq 1 - \eta \quad (\text{Dom.I})$$

$$\mathbb{P}(\mathbf{II}_t \leq C\tau_t^\alpha/2 \text{ for all } t) \geq 1 - \eta \quad (\text{Dom.II})$$

727 for some  $C > 0$  and  $\alpha \in [0, 1)$ .

728 In a nutshell, (Sub) posits that the aggregate error processes  $\mathbf{I}_t$  and  $\mathbf{II}_t$  of (D.16) are subleading  
 729 relative to the long-run drift of (D.4), while (Dom) goes a step further and asks that said errors  
 730 are asymptotically dominated by the drift in (D.4). Accordingly, under these implicit error control  
 731 conditions, we obtain the interim convergence result below:

732 **Proposition D.1.** *Let  $\mathcal{S}$  be a club set, fix some confidence threshold  $\eta > 0$ , and let  $X_t = Q(Y_t)$   
 733 be the sequence of play generated by (RL). If (Sub) and (Dom) hold, there exists an unbounded  
 734 initialization domain  $\mathcal{D} \subseteq \mathcal{V}^*$  such that*

$$\mathbb{P}(X_t \text{ converges to } \mathcal{S} \mid Y_1 \in \mathcal{D}) \geq 1 - 2\eta. \quad (\text{D.19})$$

735 *Proof of Proposition D.1.* Fix some  $z \in \mathcal{Z}$ , let  $E_t = E_z(Y_t)$ , and pick  $\alpha \in [0, 1)$  so that (Dom) holds  
 736 for some  $C > 0$ . In addition, set  $c = -\sup_{x \in \mathcal{B}} \langle v(x), z \rangle > 0$ , let  $t_0 = \inf\{t : c\tau_t > C\tau_t^\alpha\}$ , and write  
 737  $\Delta E = \max_t \{C\tau_t^\alpha - c\tau_t\}$ . Then, if  $Y_1$  is initialized in  $\mathcal{D} \leftarrow \mathcal{D}(\epsilon + \Delta E)$  where  $\epsilon$  is such that  $\mathcal{D}(\epsilon) \subseteq \mathcal{B}$ ,  
 738 we will have  $Y_t \in \mathcal{D}(\epsilon)$  for all  $t$ . Indeed, this being trivially the case for  $t = 1$ , assume it to be the  
 739 case for all  $s = 1, 2, \dots, t$ . Then, by (D.4) and our inductive hypothesis, we get

$$E_{t+1} \leq E_1 - \sum_{s=1}^t \gamma_s \langle v(X_s), z \rangle + \mathbf{I}_t + \mathbf{II}_t \leq -\epsilon - \Delta E - c\tau_t + C\tau_t^\alpha/2 + C\tau_t^\alpha/2 \leq -\epsilon - \Delta E + \Delta E = -\epsilon \quad (\text{D.20})$$

740 i.e.,  $E_{t+1} \in \mathcal{D}(\epsilon)$ , as claimed.

741 Now, since  $E_t \in \mathcal{D}(\epsilon)$  for all  $t$ , we conclude that

$$E_{t+1} \leq E_1 - c\tau_t + \mathbf{I}_t + \mathbf{II}_t \quad \text{for all } t = 1, 2, \dots \quad (\text{D.21})$$

742 Thus, if (Sub) holds, we readily get  $E_t \rightarrow -\infty$  with probability 1 on the event that (Dom.I) and  
 743 (Dom.II) both hold. This implies that  $E_t \rightarrow -\infty$ , and since  $z \in \mathcal{Z}$  above is arbitrary, we conclude  
 744 that  $X_t \rightarrow \mathcal{S}$  with probability at least  $1 - 2\eta$ , as claimed. ■

745 We are now in a position to prove Theorem 2.

746 *Proof of Theorem 2.* Our proof will hinge on showing that (Sub) and (Dom) hold under the stated  
 747 step-size and sampling parameter schedules. Our claim will then follow by a direct application of  
 748 Proposition D.1 and a reduction to a suitable subface of  $\mathcal{X}$ .

749 First, regarding (Sub), the law of large numbers for martingale difference sequences [21, Theorem  
 750 2.18] shows that  $\mathbf{I}_t / \tau_t \rightarrow 0$  with probability 1 on the event  $\{\sum_t \gamma_t^2 \mathbb{E}[\xi_t^2 \mid \mathcal{F}_t] / \tau_t^2 < \infty\}$ . However

$$\mathbb{E}[\xi_t^2 \mid \mathcal{F}_t] \leq 2^2 \mathbb{E}[\|U_t\|_\infty^2 \mid \mathcal{F}_t] \leq 2^2 \sigma_t^2 = \mathcal{O}(t^{2\ell_\sigma}) \quad (\text{D.22})$$

751 so, in turn, we get

$$\sum_t \frac{\gamma_t^2 \mathbb{E}[\xi_t^2 \mid \mathcal{F}_t]}{\tau_t^2} = \mathcal{O}\left(\sum_t \frac{\gamma_t^2 \sigma_t^2}{\tau_t^2}\right) = \mathcal{O}\left(\sum_t \frac{t^{-2\ell_\gamma} t^{2\ell_\sigma}}{t^{2(1-\ell_\gamma)}}\right) = \mathcal{O}\left(\sum_t \frac{1}{t^{2-2\ell_\sigma}}\right) < \infty \quad (\text{D.23})$$

752 given that  $\ell_\sigma < 1/2$ . This establishes (Sub.I); the remaining requirement (Sub.II) follows trivially by  
 753 noting that  $\sum_{s=1}^t \gamma_s B_s / \sum_{s=1}^t \gamma_s \rightarrow 0$  if and only if  $B_t \rightarrow 0$ , which is immediate from the theorem's  
 754 assumptions.

Second, regarding (Dom), since  $B_t$  is deterministic and  $B_t = \mathcal{O}(1/t^{\ell_b})$  for some  $\ell_b > 0$ , it is always possible to find  $C > 0$  and  $\alpha \in (0, 1)$  so that (Dom.I) holds. We are thus left to establish (Dom.I). To that end, let  $I_t^* = \sup_{1 \leq s \leq t} |I_s|$  and set  $P_t := \mathbb{P}(I_t^* > C\tau_t^\alpha/2)$  so

$$P_t \leq \frac{\mathbb{E}[|I_t|^q]}{(C/2)^q \tau_t^{\alpha q}} \leq c_q \frac{\mathbb{E}\left[\left(\sum_{s=1}^t \gamma_s^2 \|U_s\|_\infty^2\right)^{q/2}\right]}{\tau_t^{\alpha q}} \quad (\text{D.24})$$

where  $c_q$  is a positive constant depending only on  $C$  and  $q$ , and we used Kolmogorov's inequality (Lemma A.4) in the first step and the Burkholder–Davis–Gundy inequality (Lemma A.6) in the second.

To proceed, we will require the following variant of Hölder's inequality [8, p. 15]:

$$\left(\sum_{s=1}^t a_s b_s\right)^\rho \leq \left(\sum_{s=1}^t a_s^{\frac{\lambda \rho}{\rho-1}}\right)^{\rho-1} \sum_{s=1}^t a_s^{(1-\lambda)\rho} b_s^\rho \quad (\text{D.25})$$

valid for all  $a_s, b_s \geq 0$  and all  $\rho > 1$ ,  $\lambda \in [0, 1)$ . Then, substituting  $a_s \leftarrow \gamma_s^2$ ,  $b_s \leftarrow \|U_s\|_\infty^2$ ,  $\rho \leftarrow q/2$  and  $\lambda \leftarrow 1/2 - 1/q$ , (D.24) gives

$$P_t \leq c_q \frac{\left(\sum_{s=1}^t \gamma_s\right)^{q/2-1} \sum_{s=1}^t \gamma_s^{1+q/2} \mathbb{E}[\|U_s\|_\infty^q]}{\tau_t^{\alpha q}} \leq c_q \frac{\sum_{s=1}^t \gamma_s^{1+q/2} \sigma_s^q}{\tau_t^{1+(\alpha-1/2)q}} \quad (\text{D.26})$$

We now consider two cases, depending on whether the numerator of (D.26) is summable or not.

*Case 1:*  $\ell_\gamma(1+q/2) \geq 1+q\ell_\sigma$ . In this case, the numerator of (D.26) is summable under the theorem's assumptions, so the fraction in (D.26) behaves as  $\mathcal{O}(1/t^{(1-\ell_\gamma)(1+(\alpha-1/2)q)})$ .

*Case 2:*  $\ell_\gamma(1+q/2) < 1+q\ell_\sigma$ . In this case, the numerator of (D.26) is not summable under the theorem's assumptions, so the fraction in (D.26) behaves as  $\mathcal{O}(t^{1-\ell_\gamma(1+q/2)+q\ell_\sigma}/t^{(1-\ell_\gamma)(1+(\alpha-1/2)q)})$ .

Thus, working out the various exponents, a tedious – but otherwise straightforward – calculation shows that there exists some  $\alpha \in (0, 1)$  such that  $P_t$  is summable as long as  $\ell_\sigma < 1/2 - 1/q$  and  $0 \leq \ell_\gamma < q/(2+q)$ . Hence, if  $\gamma$  is sufficiently small relative to  $\eta$ , we conclude that

$$\mathbb{P}(I_t \leq C\tau_t^\alpha/2 \text{ for all } t) \geq 1 - \sum_t P_t \geq 1 - \eta/2. \quad (\text{D.27})$$

Finally, if  $\ell_\gamma > 1/2 + \ell_\sigma$ , (Dom.I) is a straightforward consequence of (D.24) for  $q = 2$ .

With all this in hand, the final steps of our proof proceed as follows:

**Closedness  $\implies$  Stability.** Our assertion follows by invoking Proposition D.1. ■

**Stability  $\implies$  Closedness.** Suppose that  $\mathcal{S}$  is not club. Then there exists some pure strategy  $\alpha \in \mathcal{C}$  and some deviation  $\alpha' \notin \mathcal{C}$  such that the deviation from  $\alpha$  to  $\alpha'$  is not costly to the deviating player. Thus, if we consider the restriction of the game to the face spanned by  $\alpha$  and  $\alpha'$  (a single-player game with two strategies), the corresponding score difference will be

$$y_{\alpha',t} - y_{\alpha,t} \geq \sum_{s=1}^t \gamma_s b_s + \sum_{s=1}^t \gamma_s U_s \quad (\text{D.28})$$

By our standing assumptions for  $b_t$  and  $U_t$  (and Doob's martingale convergence theorem for the latter), both  $\sum_{s=1}^t \gamma_s b_s$  and  $\sum_{s=1}^t \gamma_s U_s$  will be bounded from below by some (a.s.) finite random variable  $A_0$ . Since  $\theta$  is steep, it follows that, with probability 1,  $\liminf_{t \rightarrow \infty} (y_{\alpha,t}) > 0$ , so  $\mathcal{C}$  cannot be stable. ■

**Minimality  $\implies$  Irreducible Stability.** Suppose that  $\mathcal{S}$  is m-club. Then, by our previous claim,  $\mathcal{S}$  is stochastically asymptotically stable. If  $\mathcal{S}$  contains a proper subface  $\mathcal{S}' \subsetneq \mathcal{S}$  that is also stochastically asymptotically stable,  $\mathcal{S}'$  must be club by the converse implication of the first part of the theorem. However, in that case,  $\mathcal{S}$  would not be m-club, a contradiction which proves our claim. ■

788 **Irreducible Stability  $\implies$  Minimality.** For our last claim, assume that  $\mathcal{S}$  is irreducibly stable. By  
789 the first part of our theorem, this implies that  $\mathcal{S}$  is club. Then, if it so happens that  $\mathcal{S}$  is not m-club, it  
790 would contain a proper club subface  $\mathcal{S}' \subsetneq \mathcal{S}$ ; by the first part of our theorem, this set would be itself  
791 stochastically asymptotically stable, in contradiction to the irreducibility assumption. This shows that  
792  $\mathcal{S}$  is m-club and concludes our proof. ■

793 We are only left to establish the convergence rate estimate of [Theorem 3](#).

794 *Proof of [Theorem 3](#).* Going back to (D.21) and invoking [Lemma D.3](#) shows that there exist constants  
795  $c_1 > 0$  and  $c_2 \in \mathbb{R}$  such that, for all  $\alpha_i \in \mathcal{A}_i \setminus \mathcal{C}_i$ ,  $i \in \mathcal{N}$ , we have

$$X_{i\alpha_i,t} \leq \varphi(\theta(1^-) + E_t) \leq \varphi(c_2 - c_1\tau_t) \quad (\text{D.29})$$

796 with probability 1 on the events of (Dom). We thus get

$$\text{dist}_1(X_t, \mathcal{S}) \leq \sum_{i \in \mathcal{N}} \sum_{\alpha_i \in \mathcal{A}_i \setminus \mathcal{C}_i} \varphi(c_2 - c_1\tau_t), \quad (\text{D.30})$$

797 and our proof is complete. ■

798 As for the rate estimates of [Corollary 2](#), the proof boils down to a simple derivation of the correspond-  
799 ing rate functions:

800 *Proof of [Corollary 2](#).* By a straightforward calculation, we have:

- 801 1. If  $\theta(z) = z \log z$  then  $\varphi(z) = \exp(1 + z)$ .
- 802 2. If  $\theta(z) = -4\sqrt{z}$  then  $\varphi(z) = 4/z^2$ .
- 803 3. If  $\theta(z) = z^2/2$  then  $\varphi(z) = [z]_0^1$ .

804 Our claims then follow immediatly from the rate estimate (11) of [Theorem 2](#). ■

## 805 E Details on the numerics

806 In all our experiments, we ran the EXP3 variant of bandit FTRL (B-FTRL) (cf. [Algorithm 3](#)) with  
807 step-size and sampling radius parameters  $\gamma_t = 0.2 \times t^{-1/2}$  and  $\delta_t = 0.1 \times t^{-0.15}$  respectively. The  
808 algorithm was run for  $T = 10^4$  iterations and, to reduce graphical clutter, we plotted only every third  
809 point of each trajectory. Trajectories have been colored throughout with darker hues indicating later  
810 times (e.g., light blue indicates that the trajectory is closer in time to its starting point, darker shades  
811 of blue indicate proximity to the termination time). The algorithm's initial conditions were taken  
812 from a uniform initialization grid of the form  $y_1 \in \{-1, 0, 1\}^3$  and perturbed by a uniform random  
813 number in  $[-0.1, 0.1]$  to avoid non-generic initializations.

814 The payoffs of the chosen games were normalized to  $[-1, 1]$  and players are assumed to choose  
815 between two actions labeled “O” and “1”. The specific tableaus are shown in the table below, next to  
816 the respective portrait (all taken from [Fig. 1](#)).

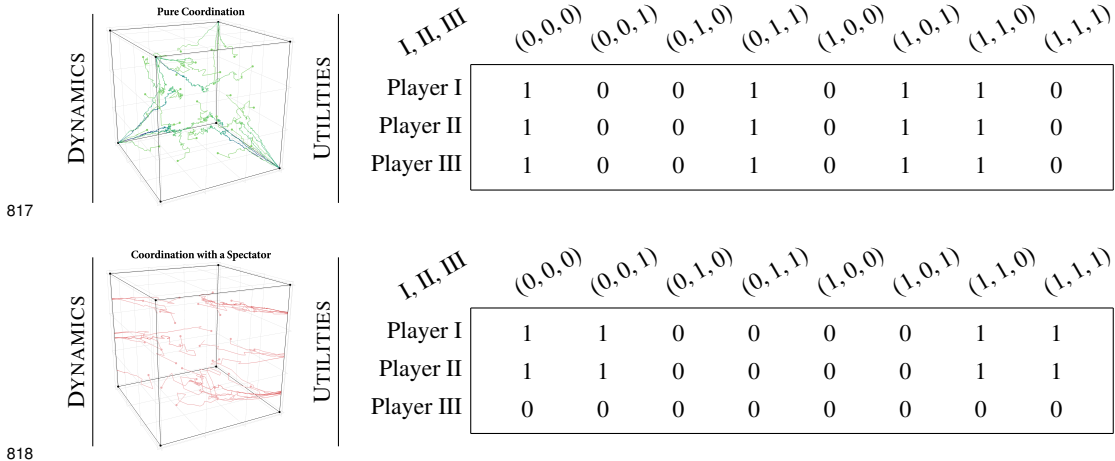

819

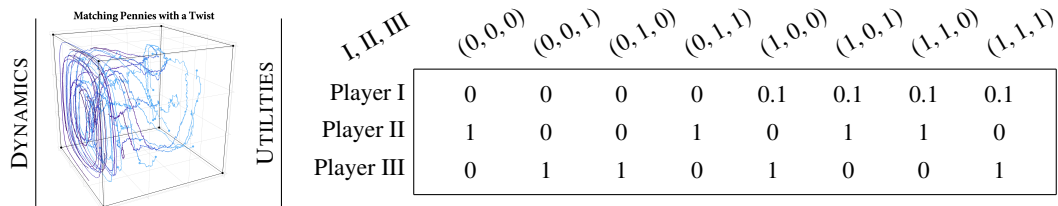

820

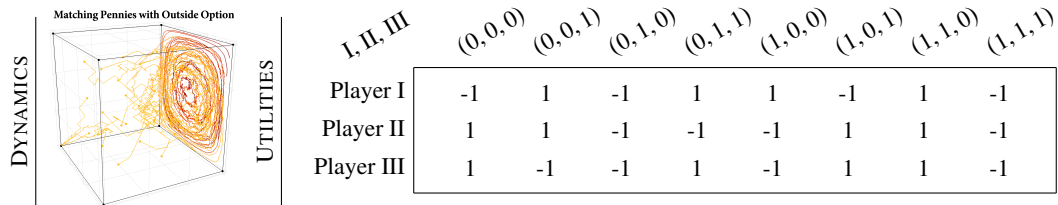

Supplement: Supplementary file 1 [file f7e8bc4c853e3e58bc487e213c79c587-Supplemental-Conference.pdf]
